# Supplementary material
Source: Research Square preprint supplement (doi:10.21203/rs.3.rs-9373070/v1)

**Full and uncropped Western Blot for Figure 1A (IRE1)**

Blots 1-11 are in the figure.

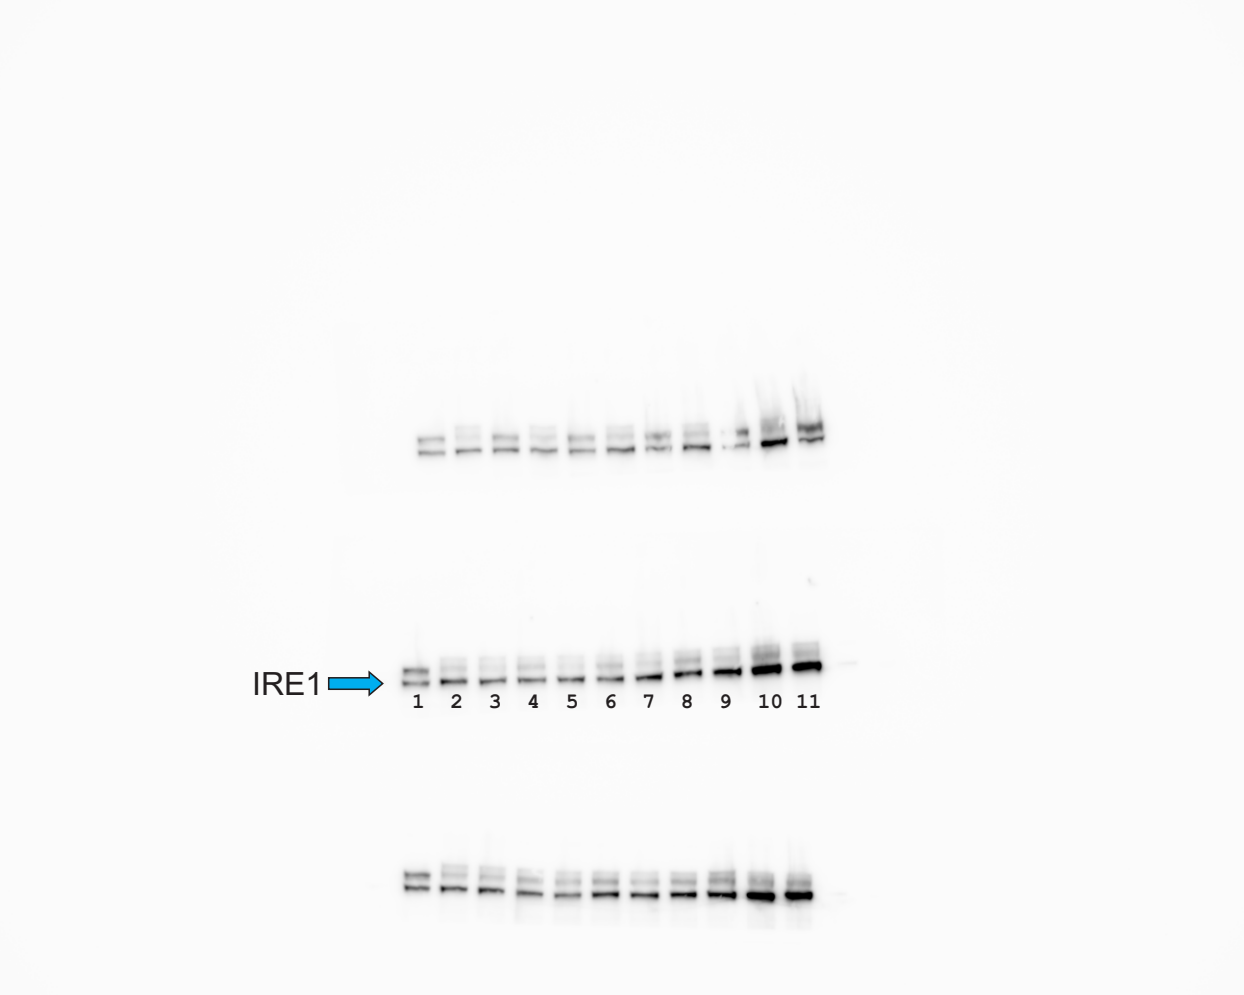

**Full and uncropped Western Blot for Figure 1A (XBP1s)**

Blots 1-11 are in the figure.

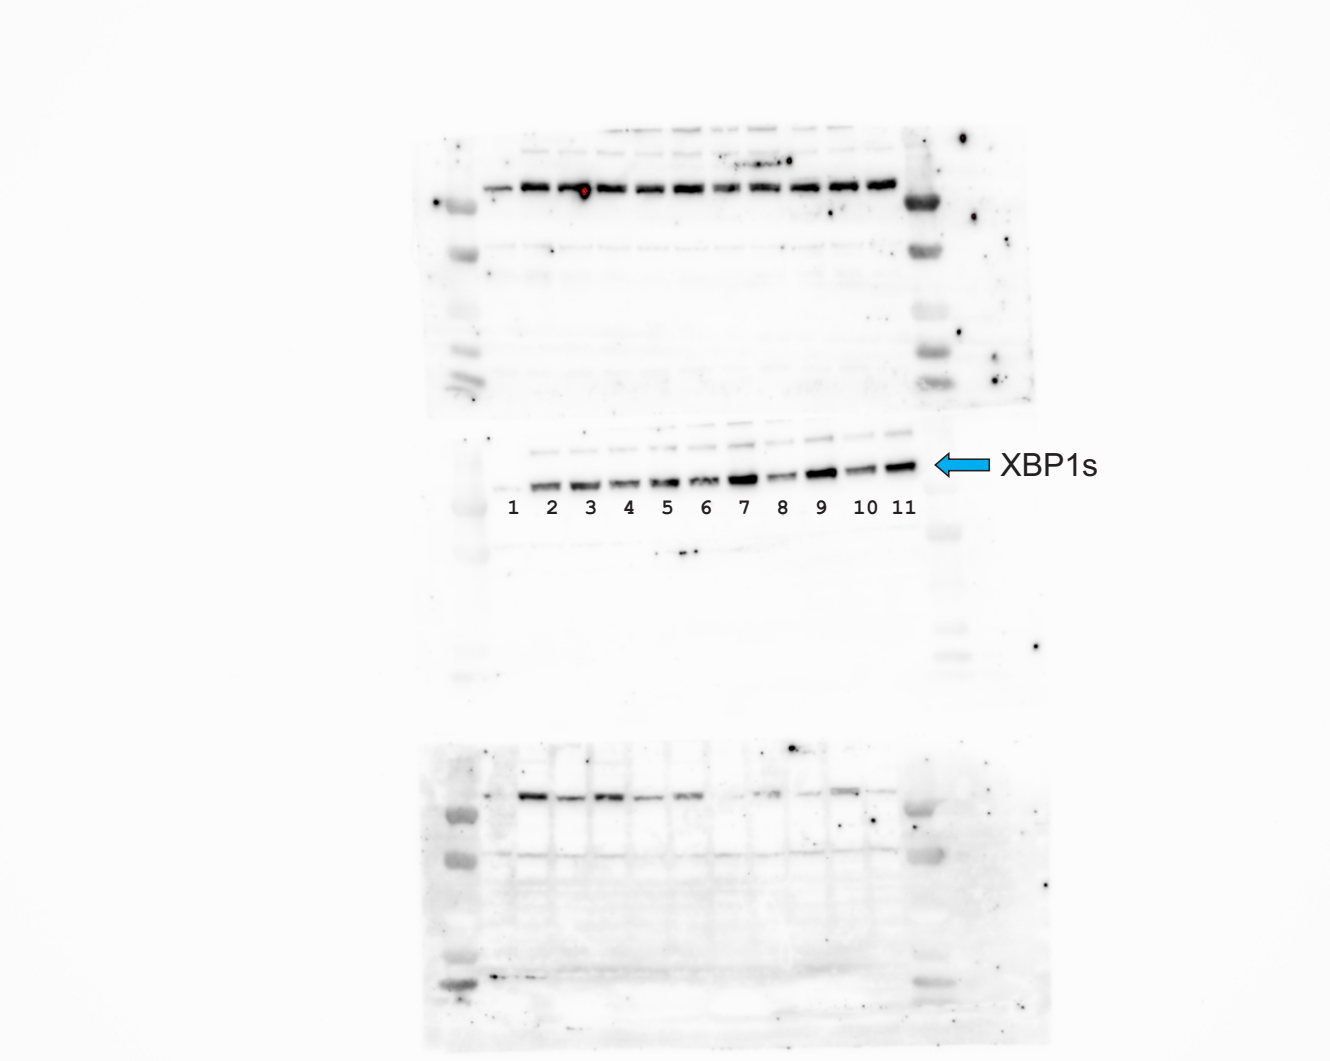

**Full and uncropped Western Blot for Figure 1A (PERK)**

Blots 1-11 are in the figure.

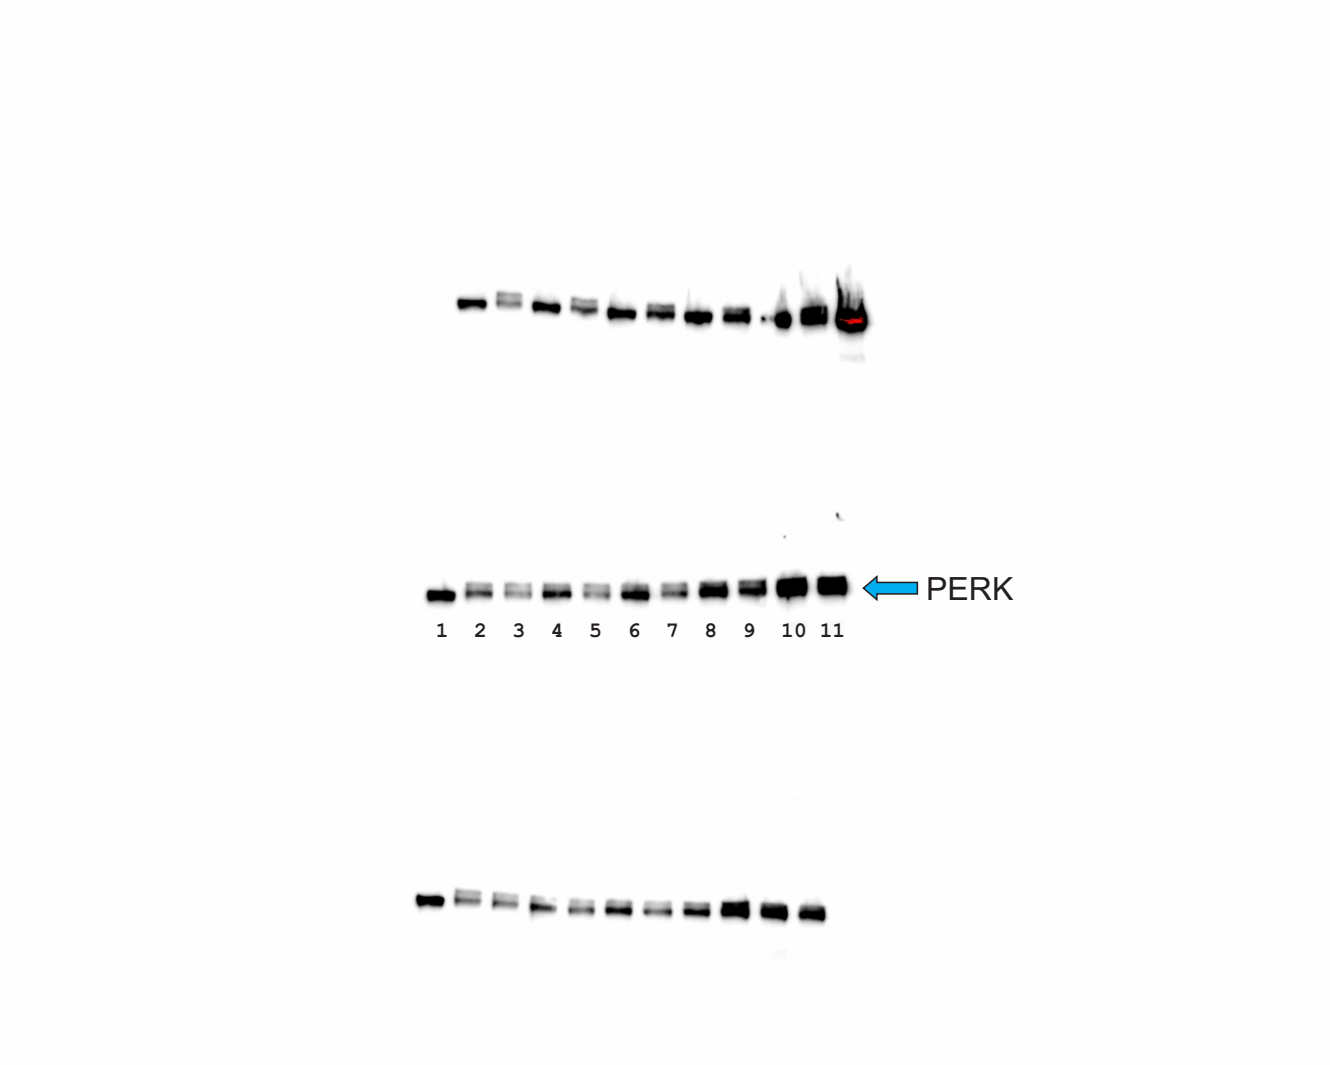

**Full and uncropped Western Blot for Figure 1A (Actin)**

Blots 1-11 are in the figure.

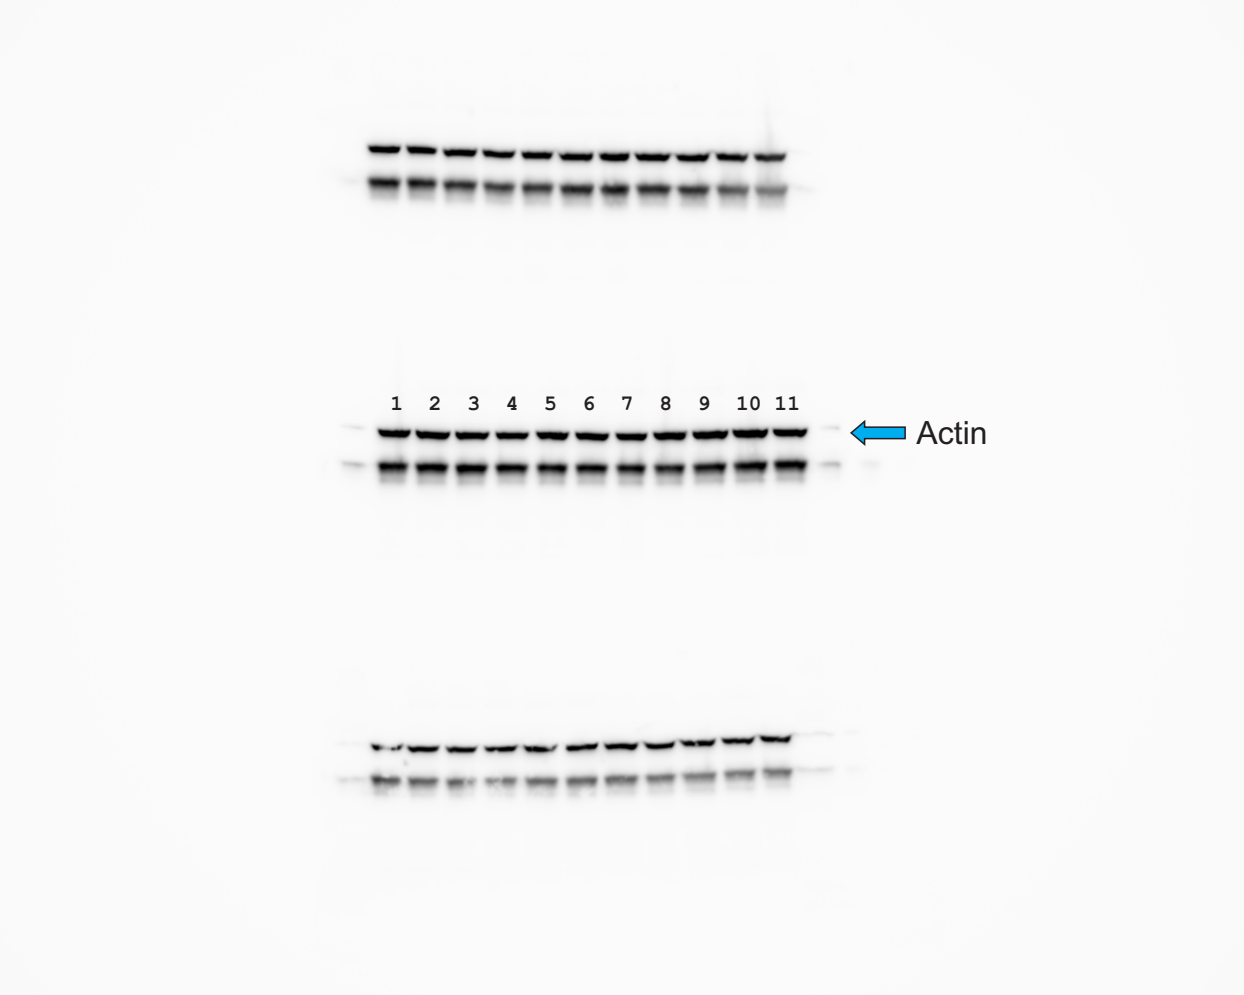

**Full and uncropped Western Blot for Figure 1A (ATF6)**

Blots 1-11 are in the figure.

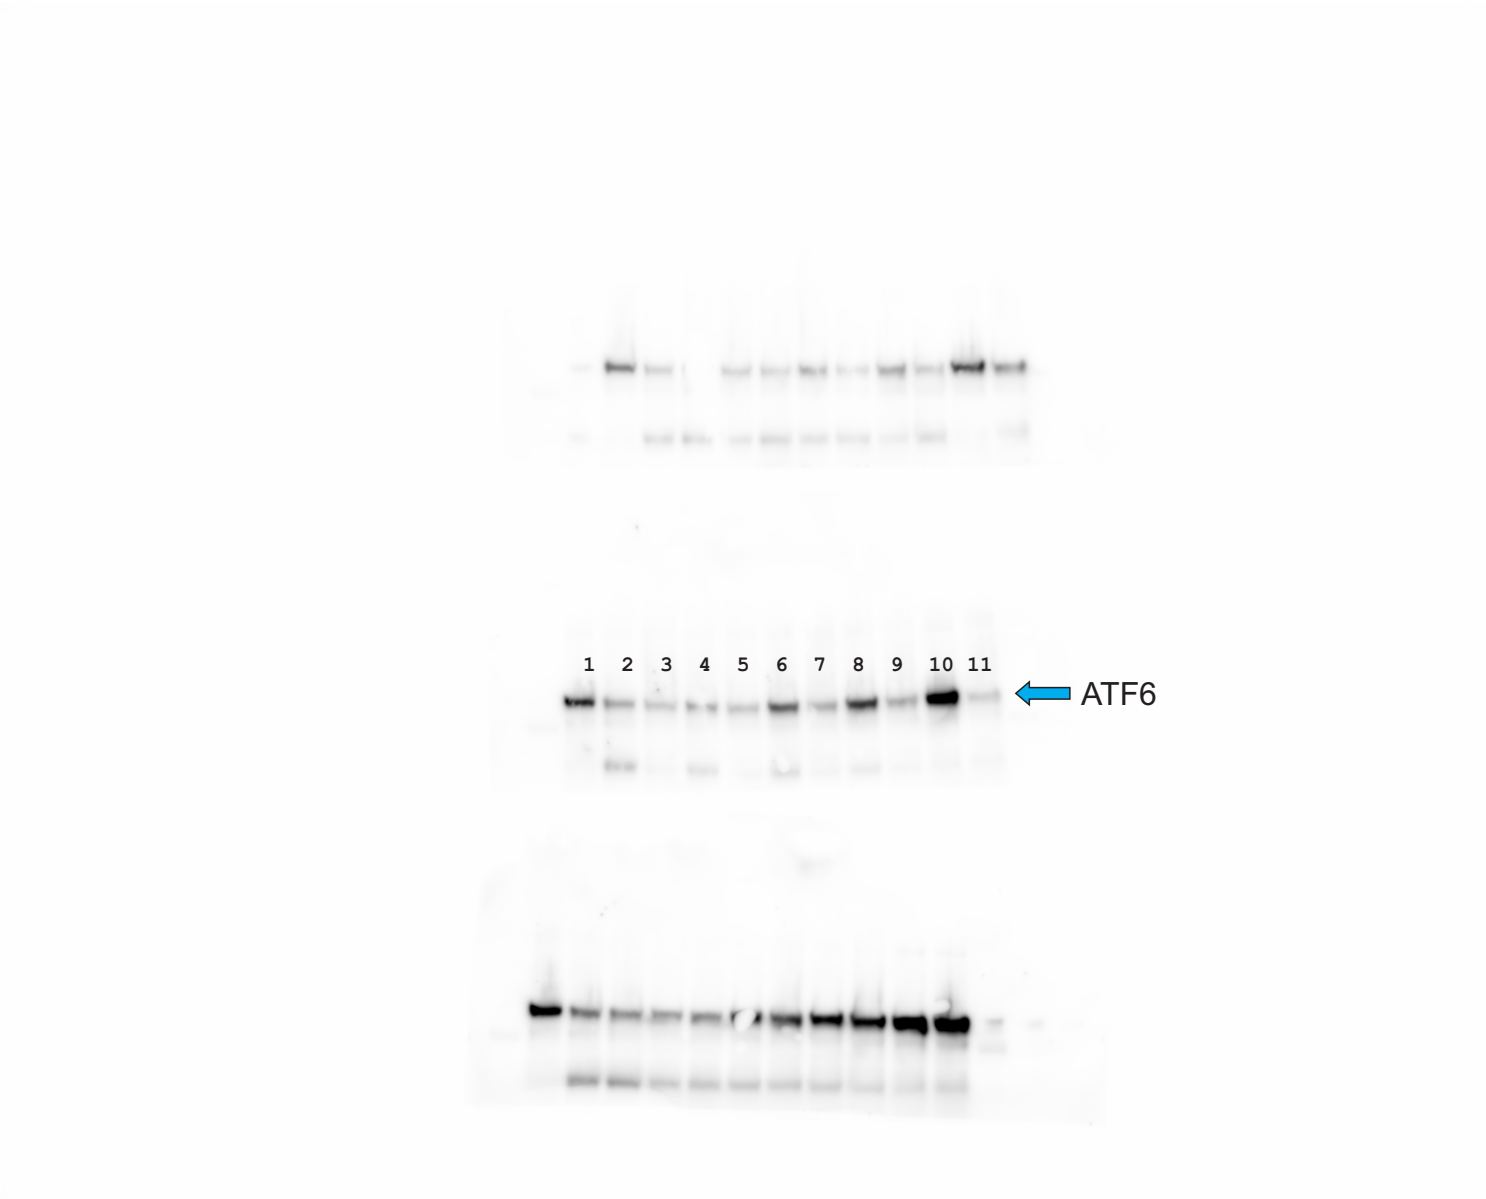

**Full and uncropped Western Blot for Figure 1A (ATF6N)**

Blots 1-11 are in the figure.

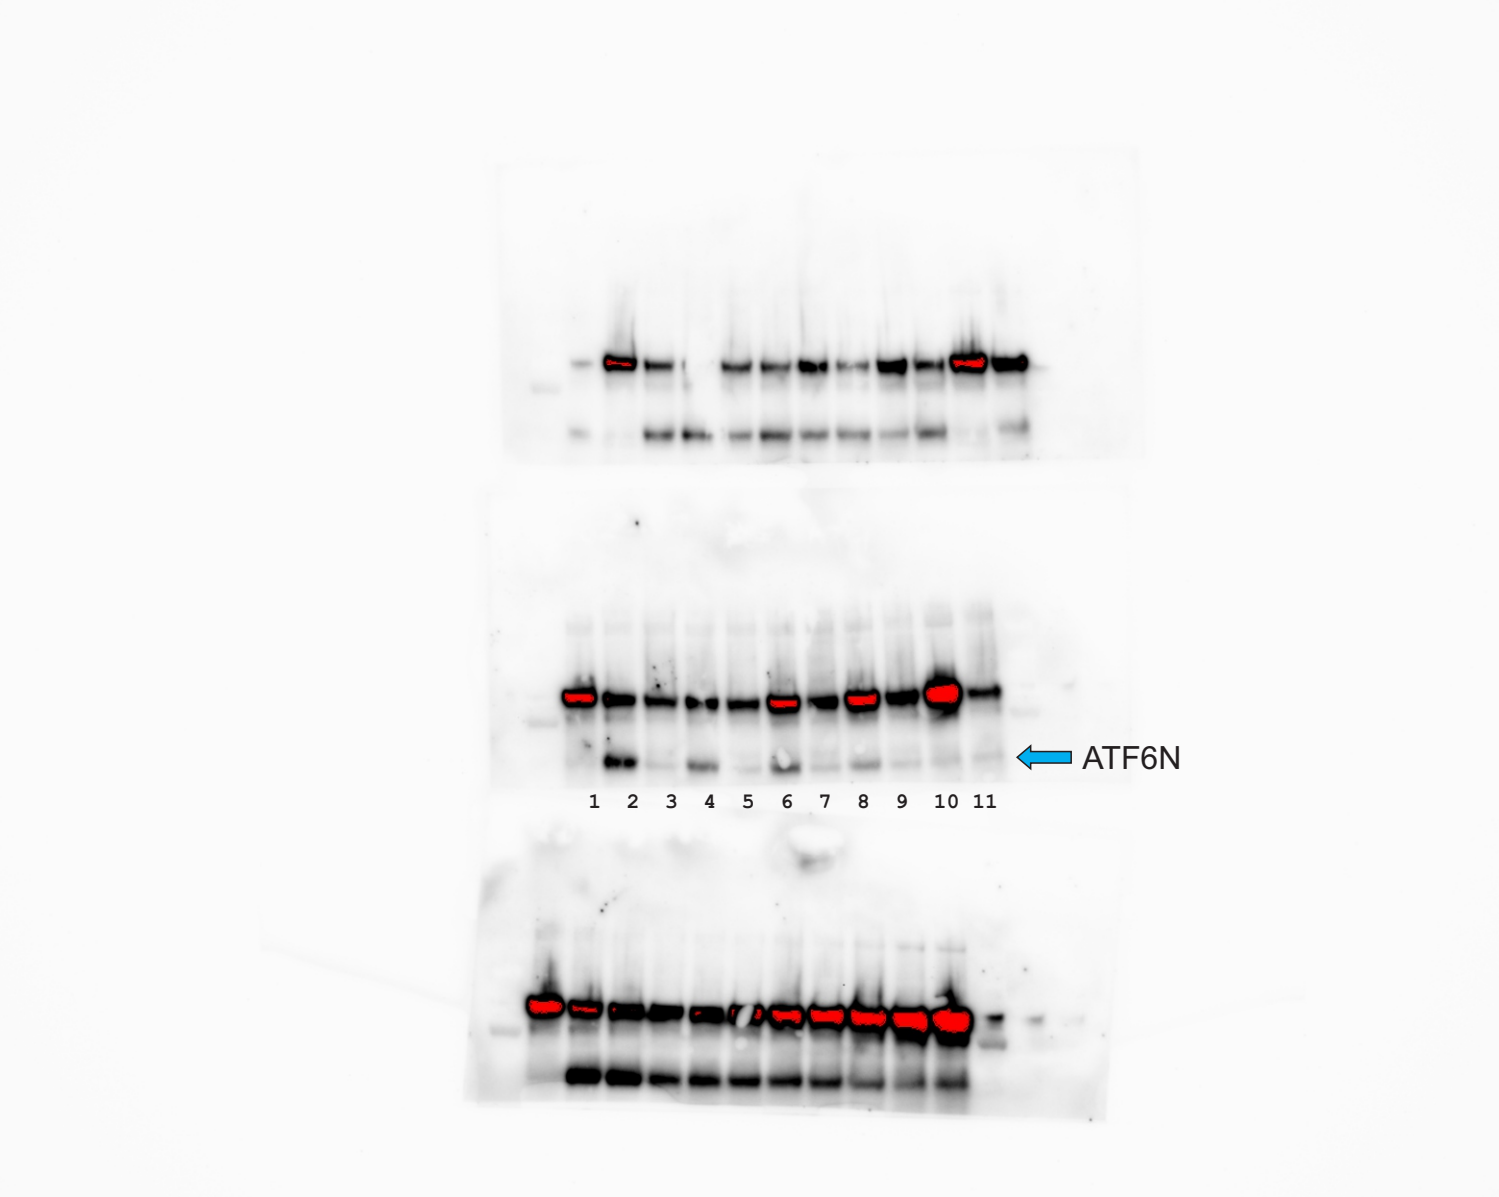

**Full and uncropped Western Blot for Figure 1A (Actin)**

Blots 1-11 are in the figure.

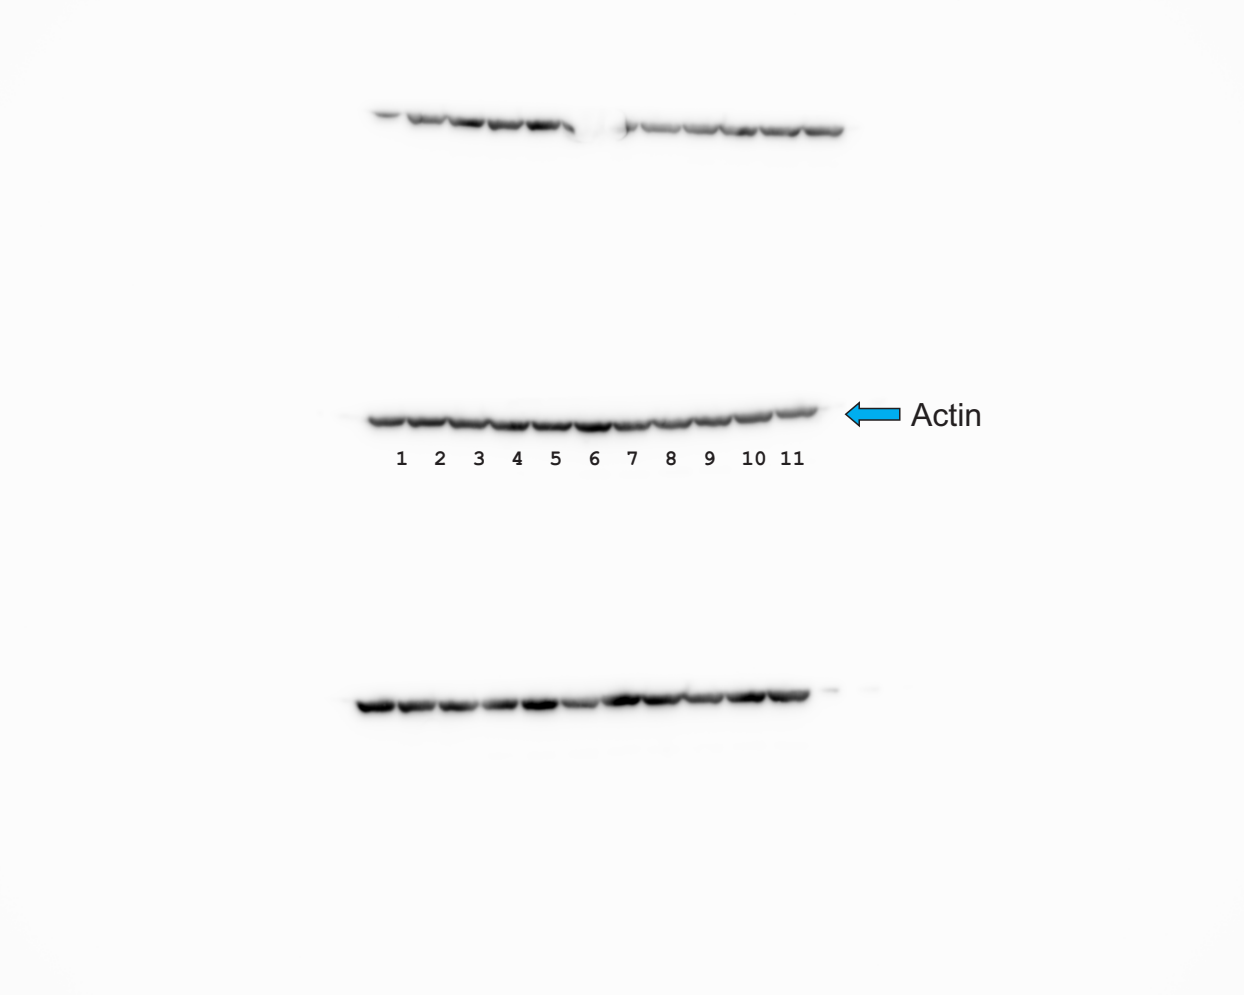

**Full and uncropped Western Blot for Figure 1C (XBP1s)**

Blots 1-4 are in the figure.

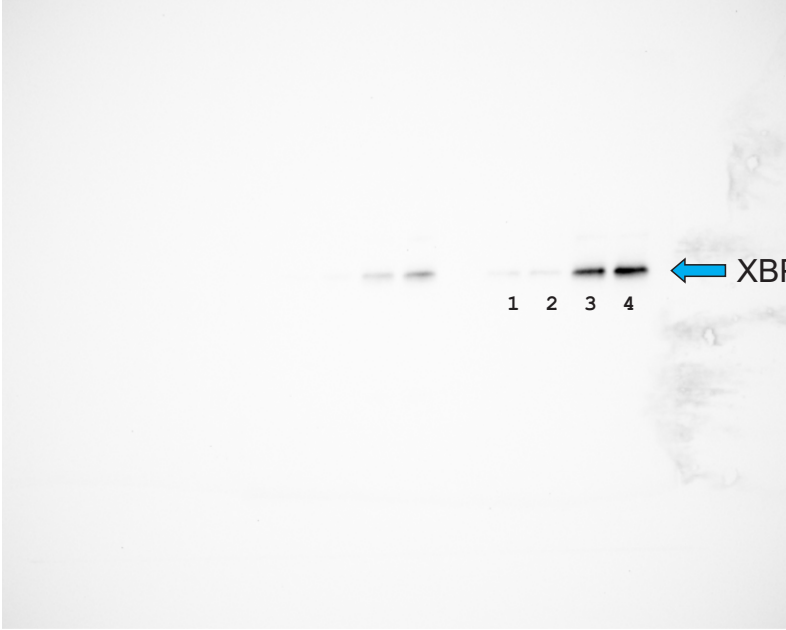

**Full and uncropped Western Blot for Figure 1C (Actin)**

Blots 1-4 are in the figure.

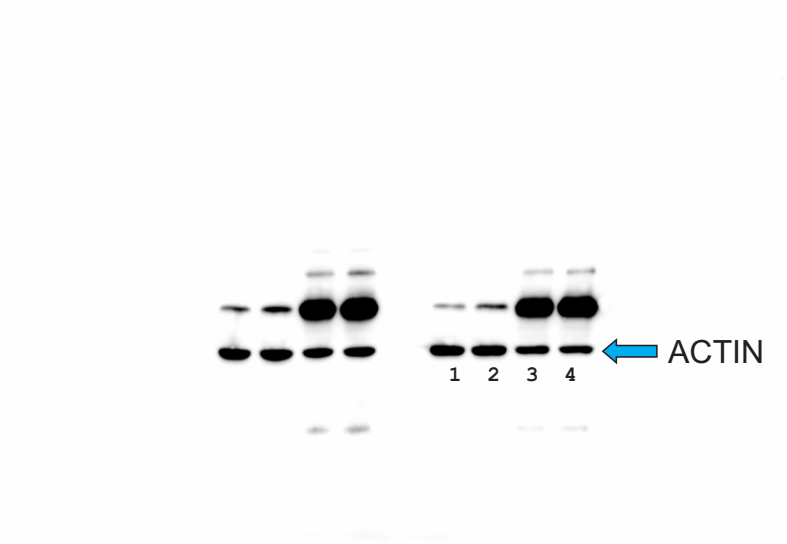

**Full and uncropped Western Blot for Figure 1C (PERK)**

Blots 1-4 are in the figure.

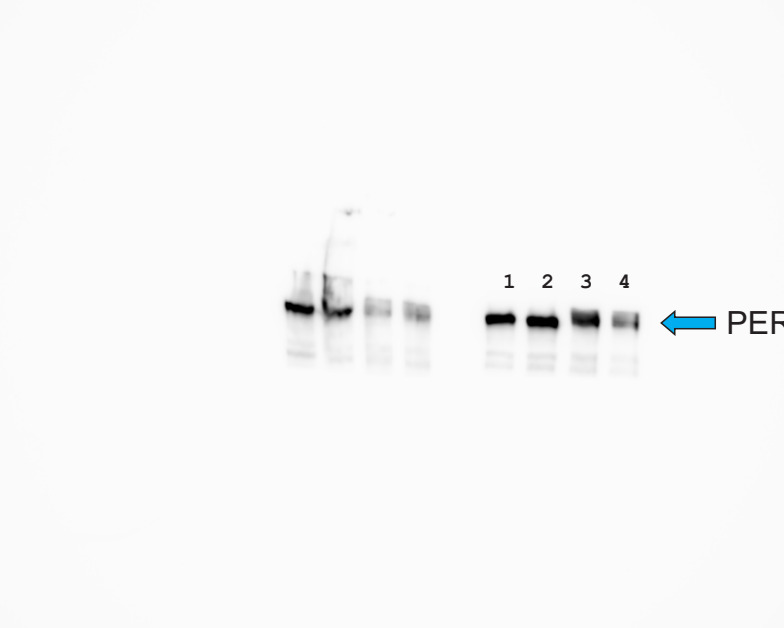

**Full and uncropped Western Blot for Figure 1C (Actin)**

Blots 1-4 are in the figure.

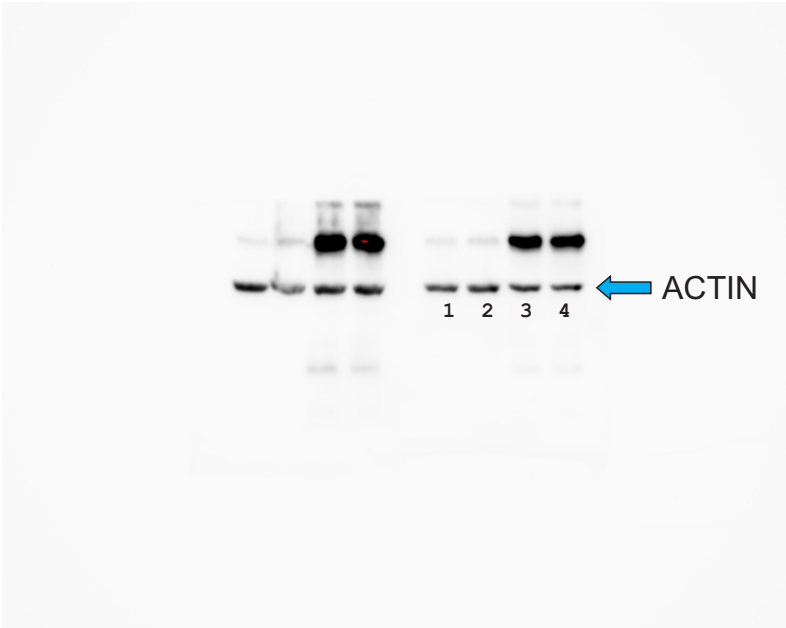

**Full and uncropped Western Blot for Figure 1C (ATF6)**  
Blots 1-4 are in the figure.

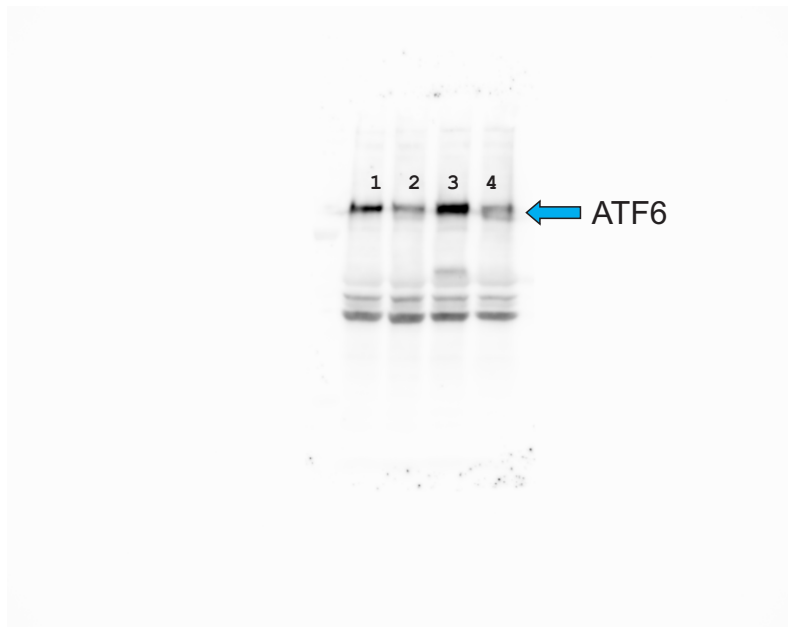

**Full and uncropped Western Blot for Figure 1C (ATF6N)**  
Blots 1-4 are in the figure.

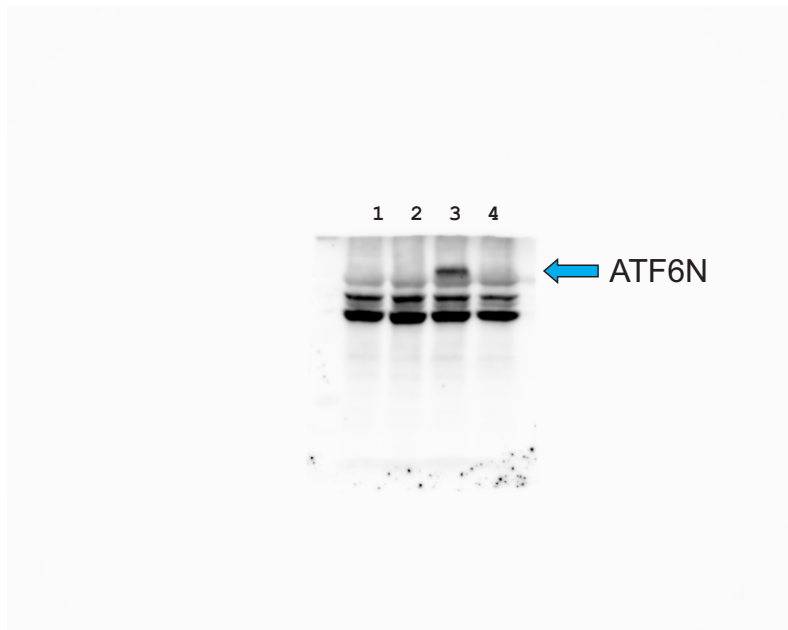

**Full and uncropped Western Blot for Figure 1C (Actin)**

Blots 1-4 are in the figure.

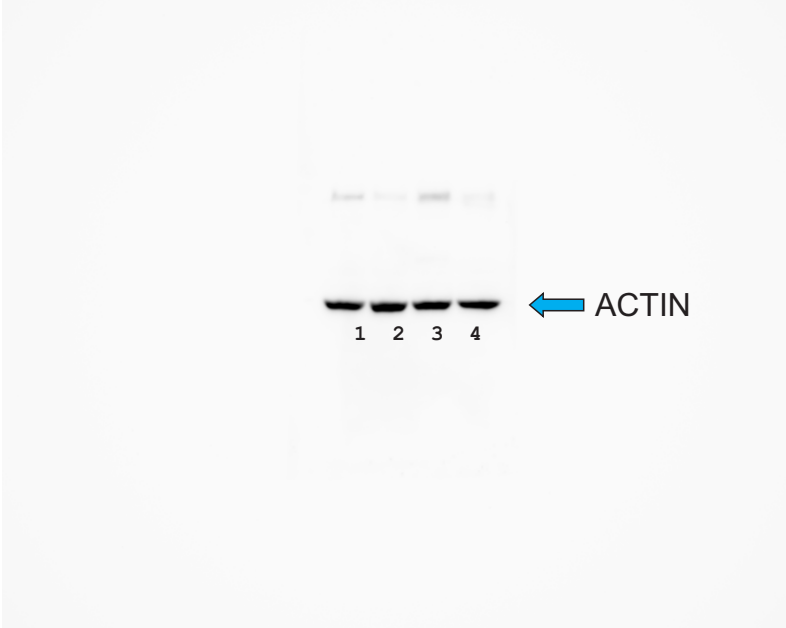

**Full and uncropped Western Blot for Figure 1D (XBP1s)**

Blots 1-4 are in the figure.

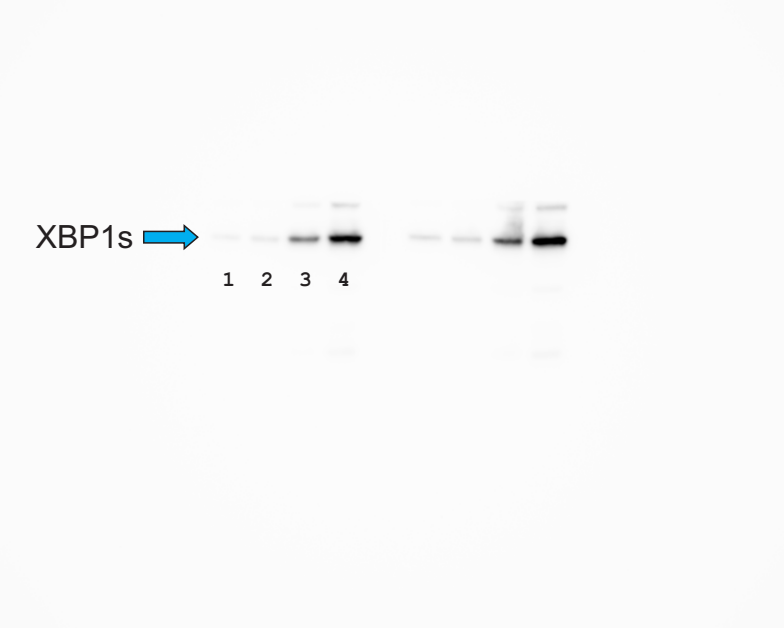

**Full and uncropped Western Blot for Figure 1D (PERK)**

Blots 1-4 are in the figure.

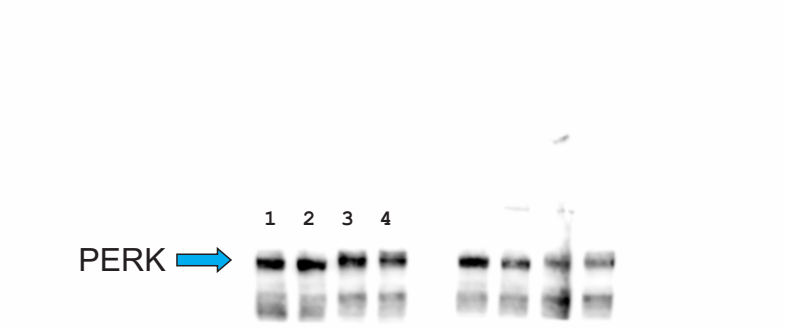

**Full and uncropped Western Blot for Figure 1D (Actin)**

Blots 1-4 are in the figure.

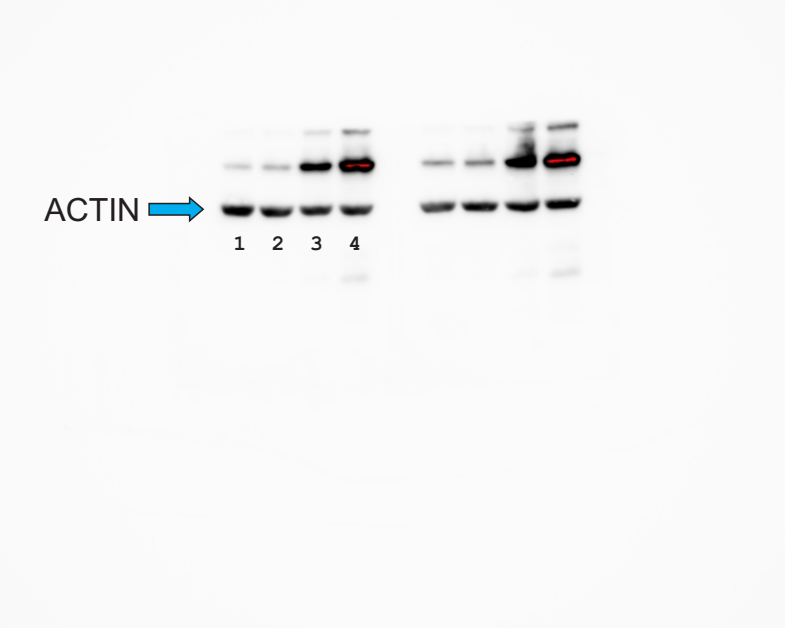

**Full and uncropped Western Blot for Figure 1D (ATF6)**

Blots 1-4 are in the figure.

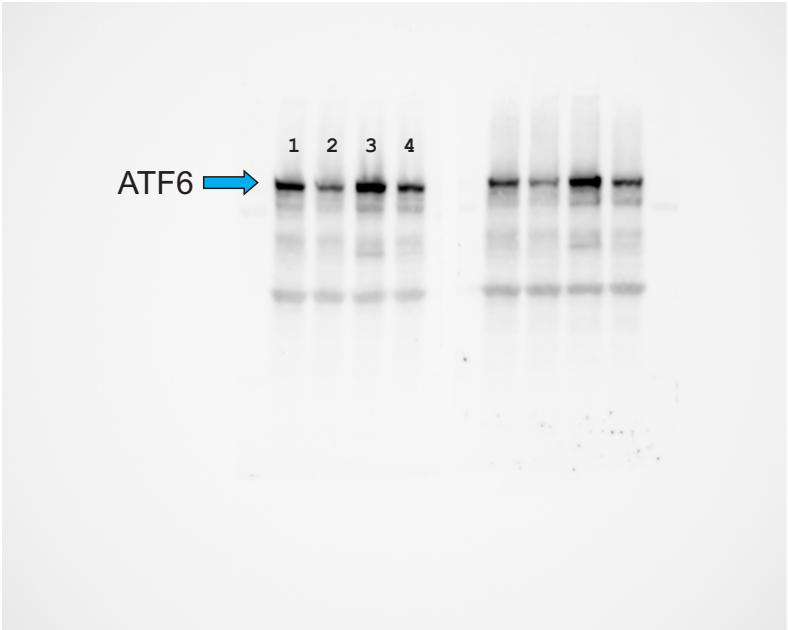

**Full and uncropped Western Blot for Figure 1D (ATF6N)**

Blots 1-4 are in the figure.

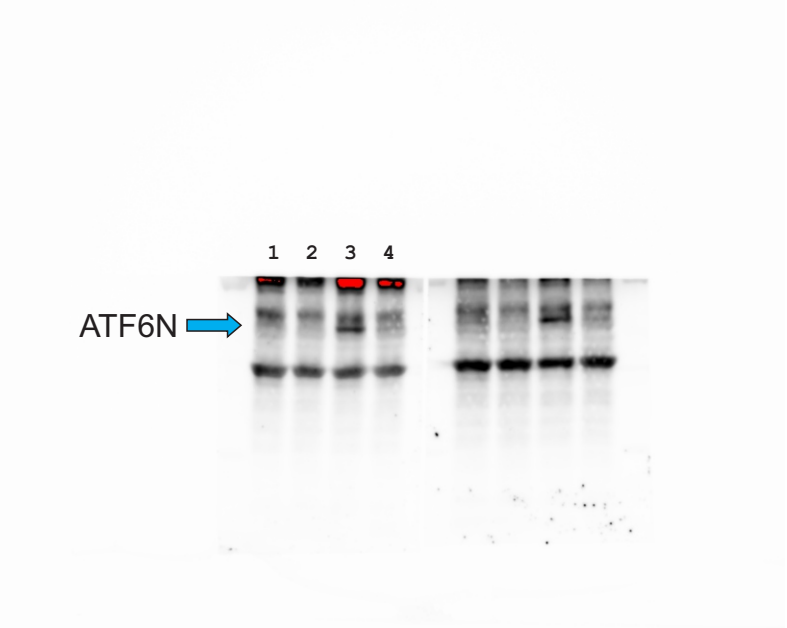

**Full and uncropped Western Blot for Figure 1D (Actin)**

Blots 1-4 are in the figure.

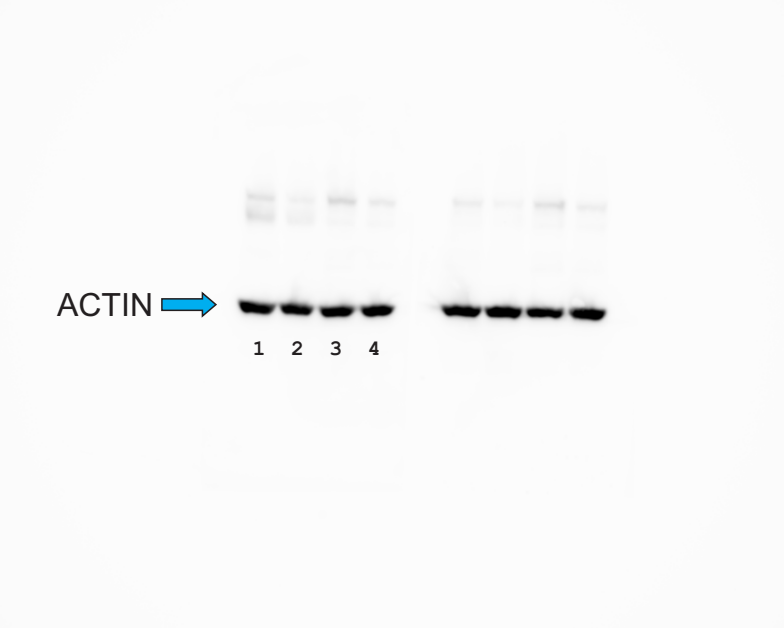

**Full and uncropped Western Blot for Figure 2A (ATF6)**

Blots 1-4 are in the figure.

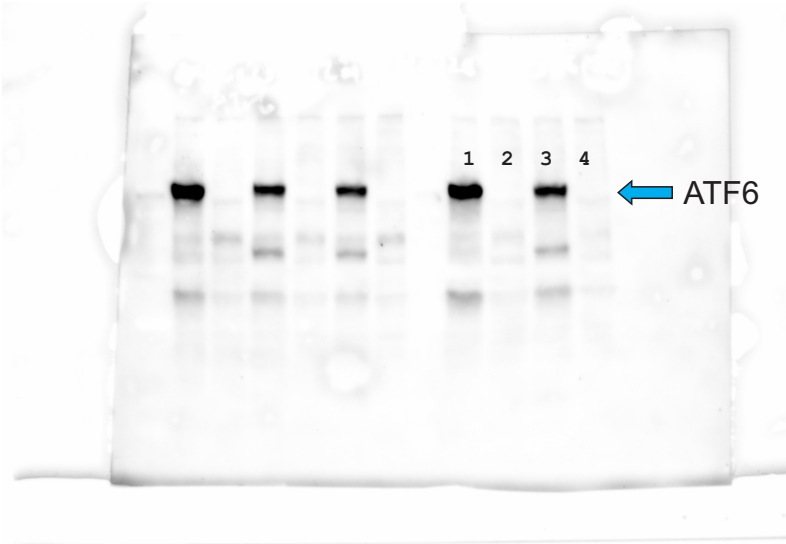

**Full and uncropped Western Blot for Figure 2A (ATF6N)**

Blots 1-4 are in the figure.

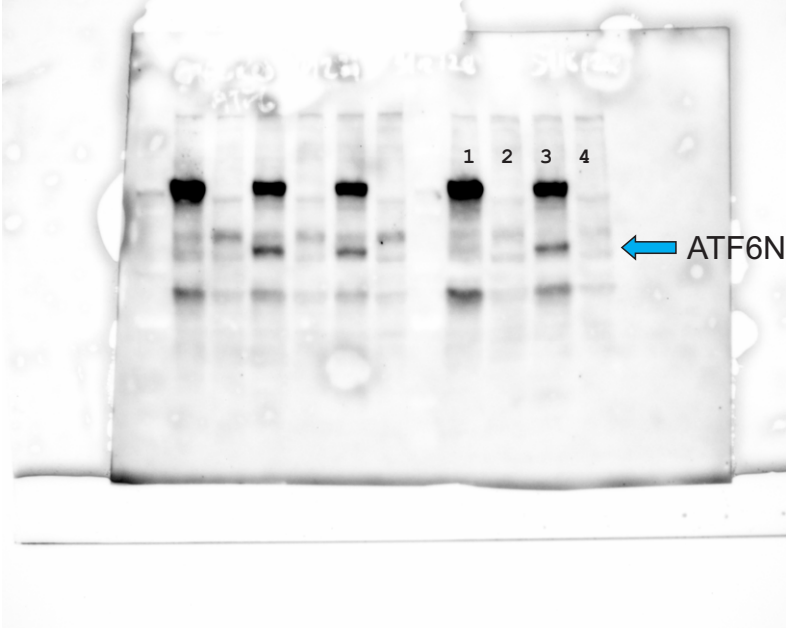

**Full and uncropped Western Blot for Figure 2A (Actin)**

Blots 1-4 are in the figure.

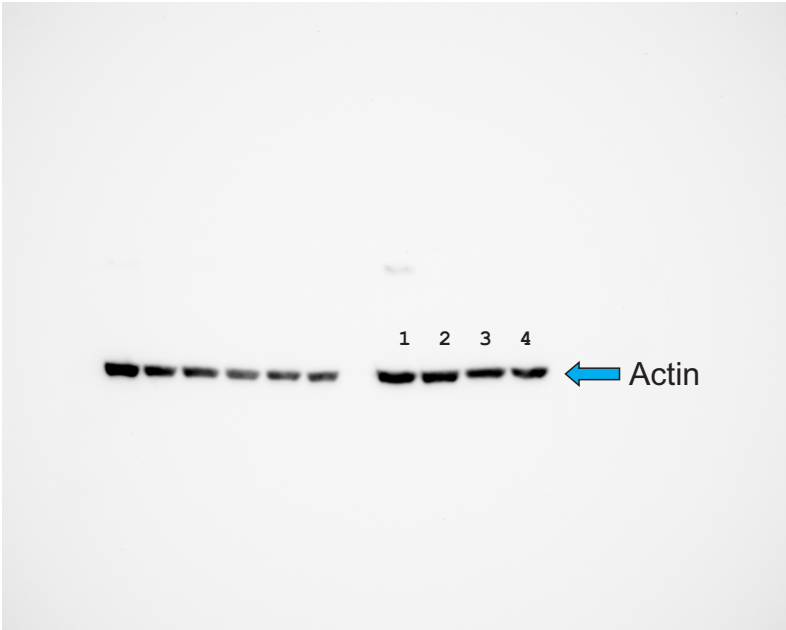

**Full and uncropped Western Blot for Figure 2B (KDEL)**

Blots 1-4 are in the figure.

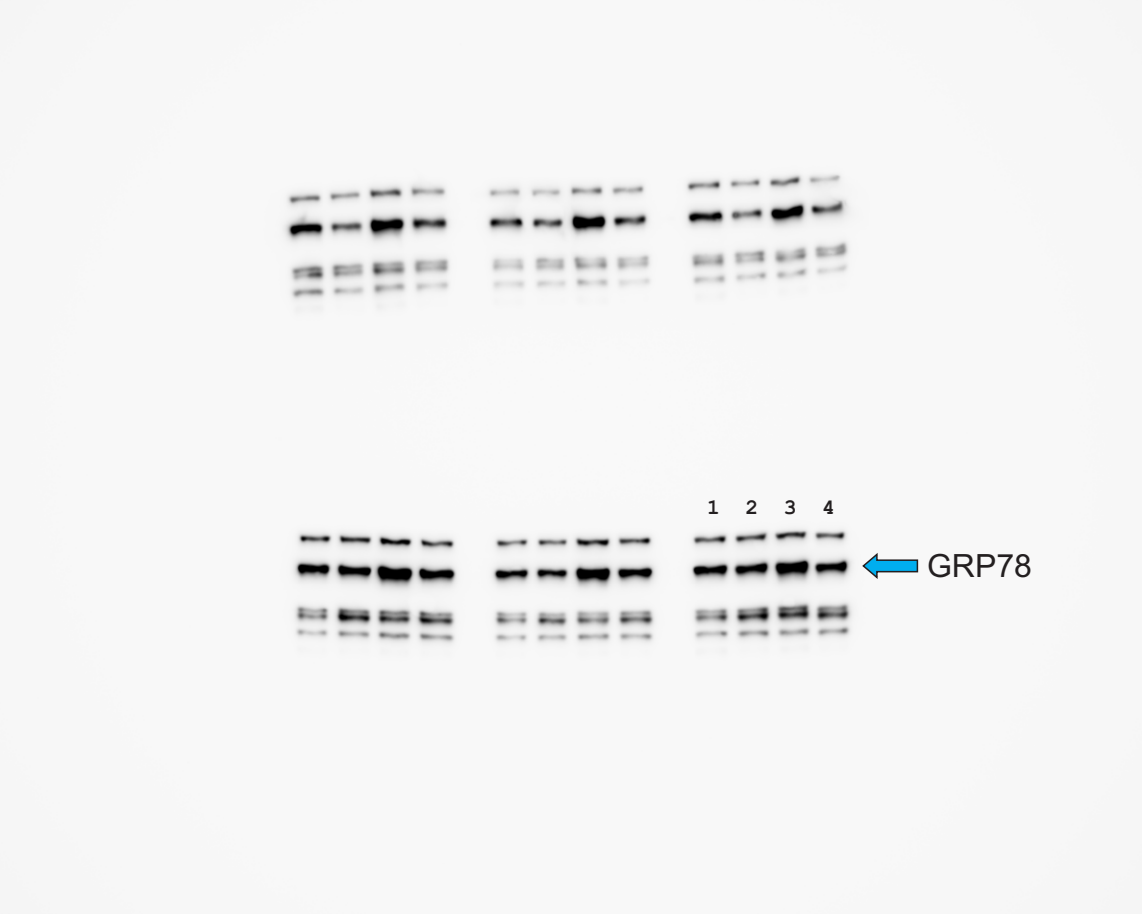

**Full and uncropped Western Blot for Figure 2B (Actin)**

Blots 1-4 are in the figure.

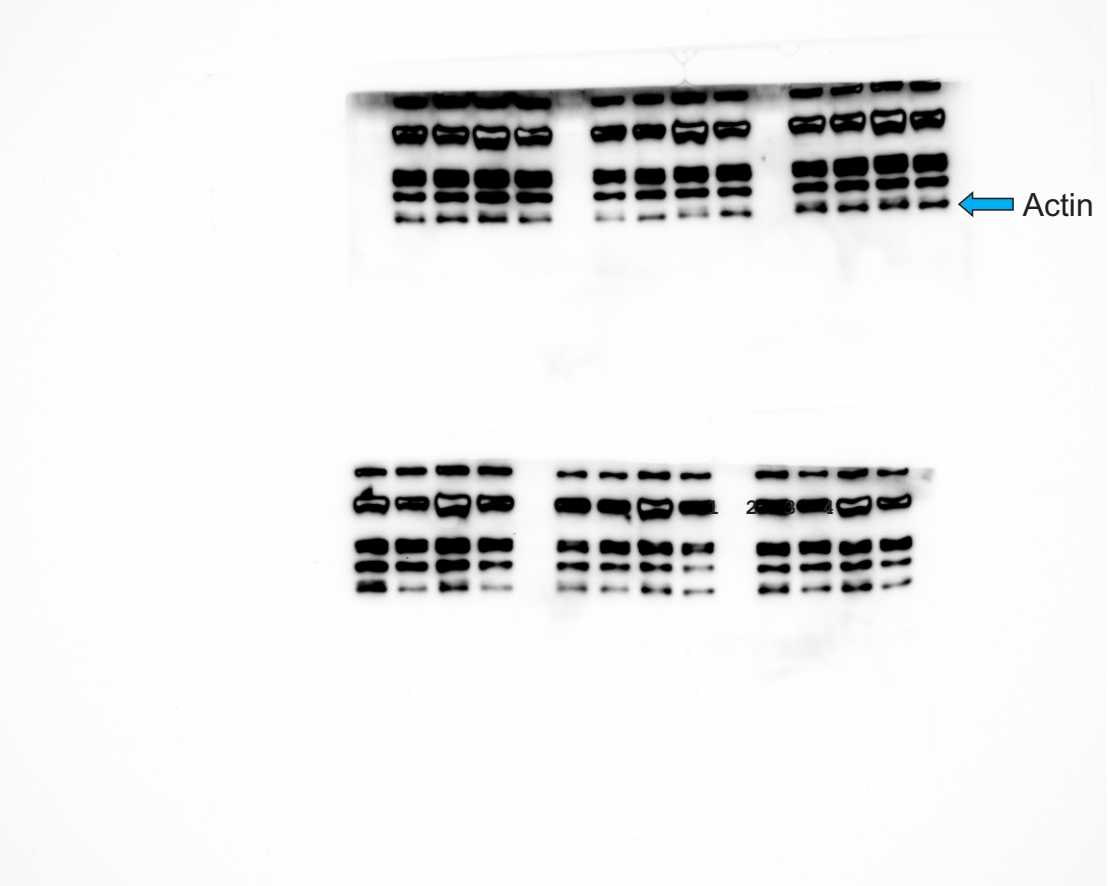

**Full and uncropped Western Blot for Figure 2C (ATF6)**

Blots 1-4 are in the figure.

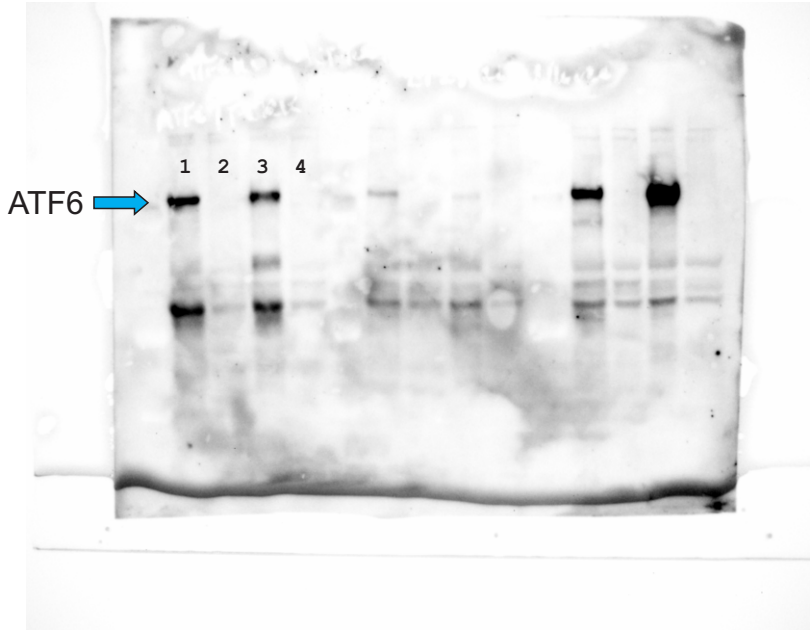

**Full and uncropped Western Blot for Figure 2C (ATF6N)**

Blots 1-4 are in the figure.

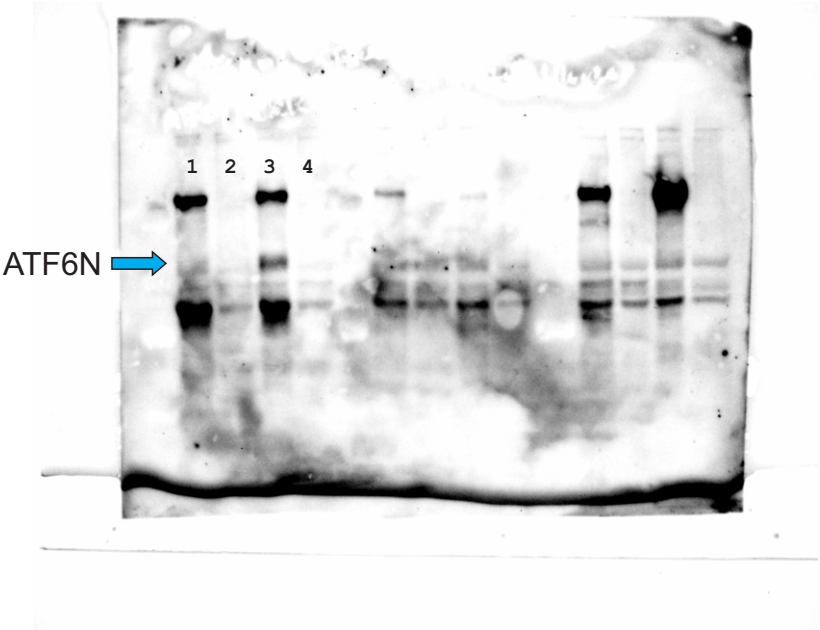

**Full and uncropped Western Blot for Figure 2C (Actin)**

Blots 1-4 are in the figure.

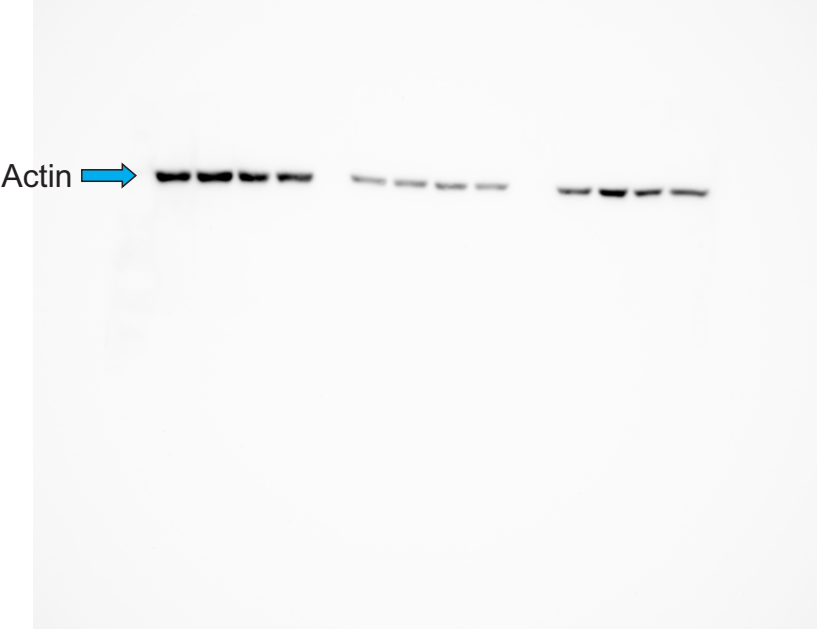

**Full and uncropped Western Blot for Figure 2D (KDEL)**

Blots 1-4 are in the figure.

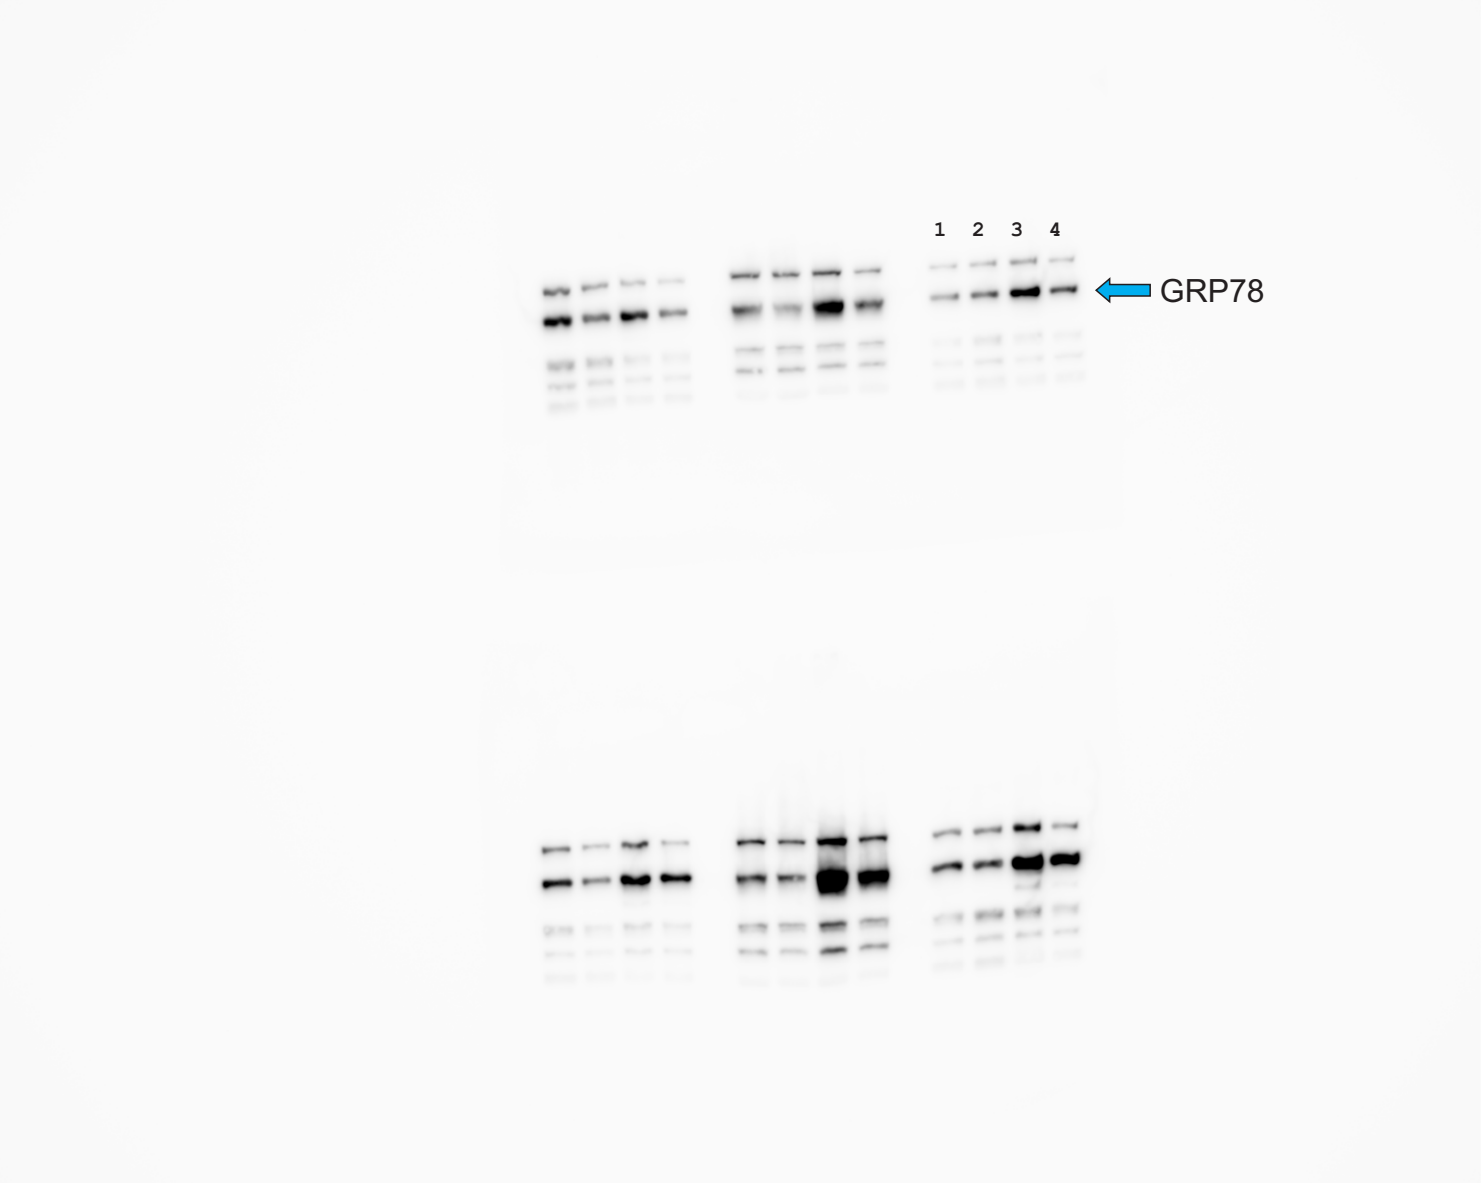

**Full and uncropped Western Blot for Figure 2D (Actin)**

Blots 1-4 are in the figure.

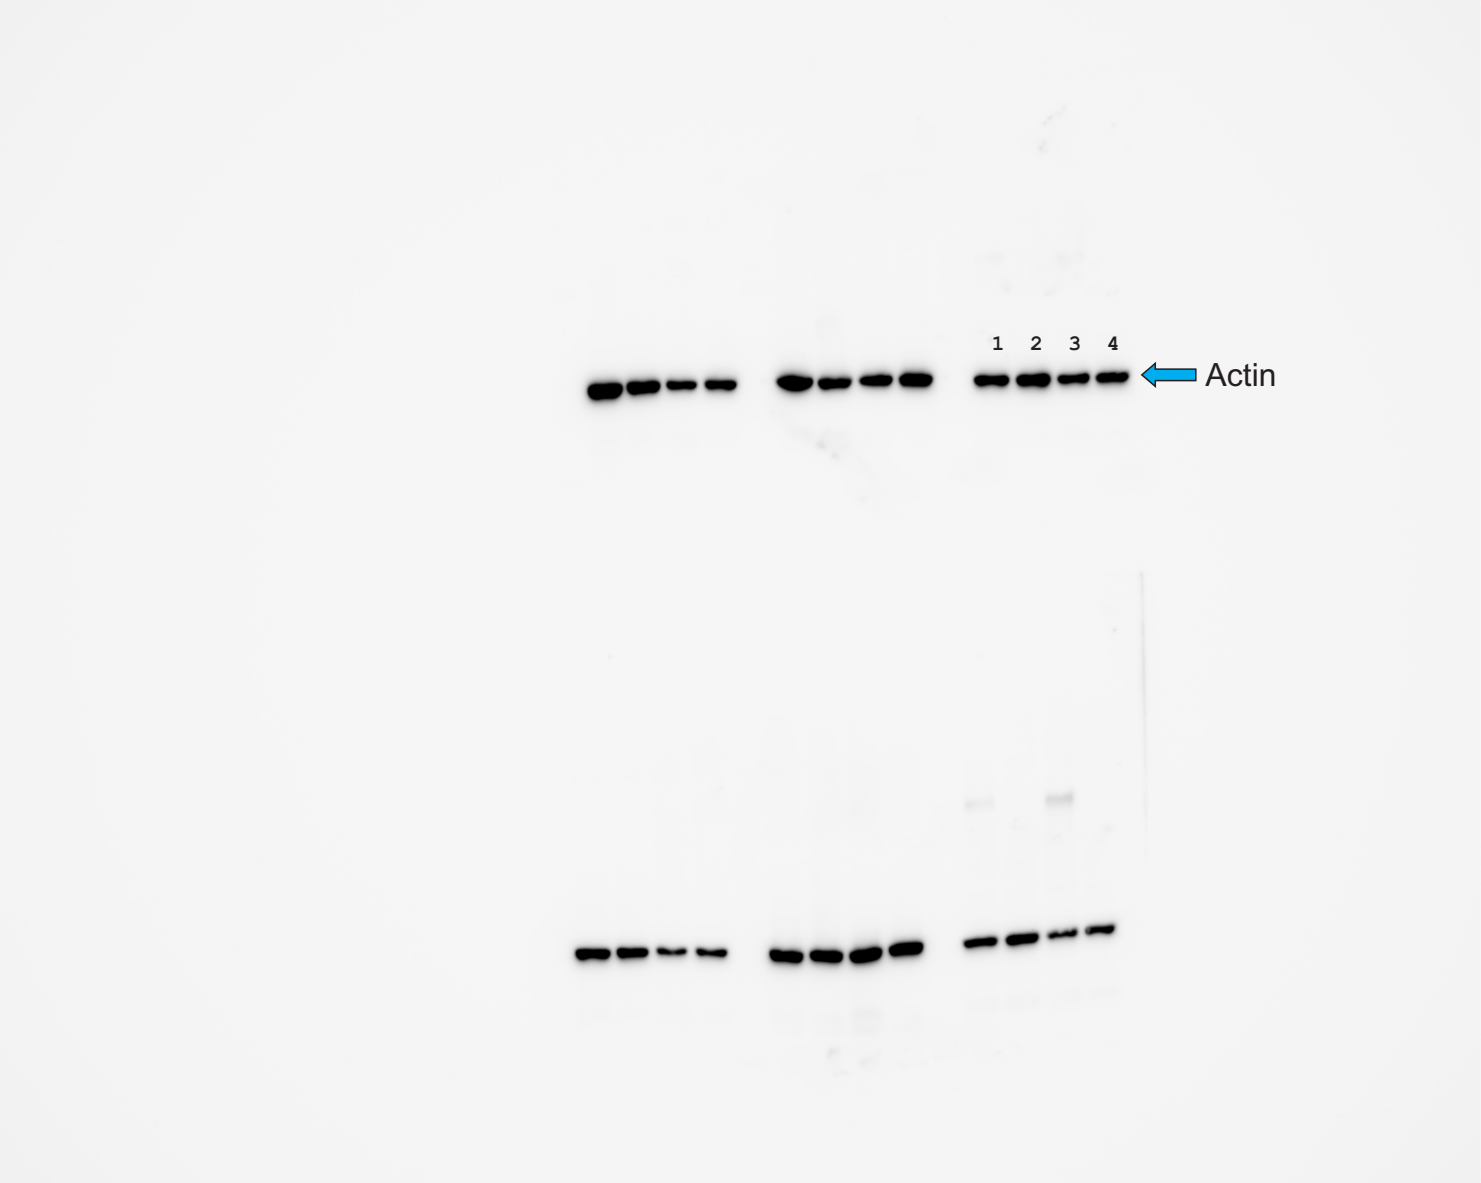

**Full and uncropped Western Blot for Figure 3A (XBP1s) [6h]**

Blots 1-4 are in the figure.

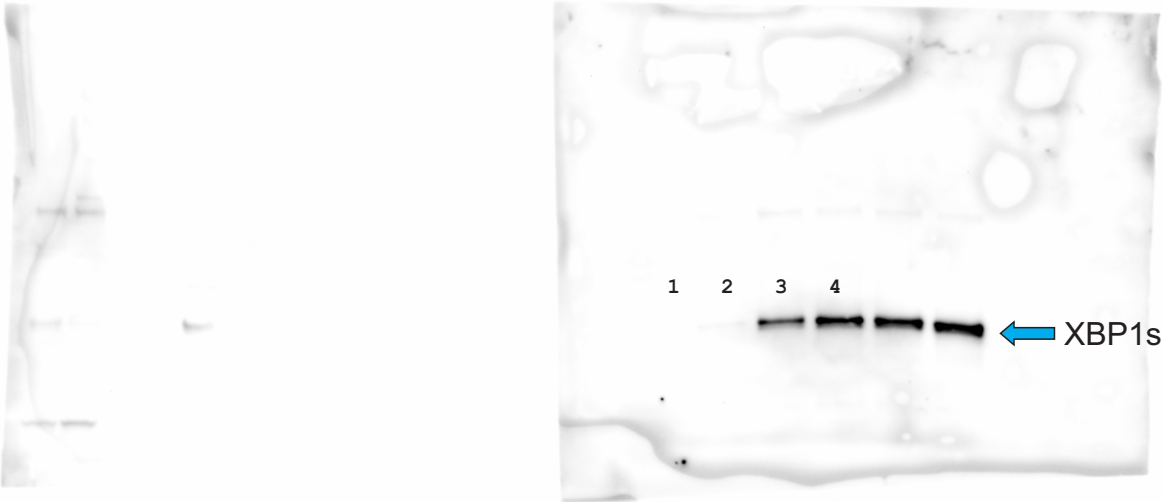

**Full and uncropped Western Blot for Figure 3A (Actin) [6h]**

Blots 1-4 are in the figure.

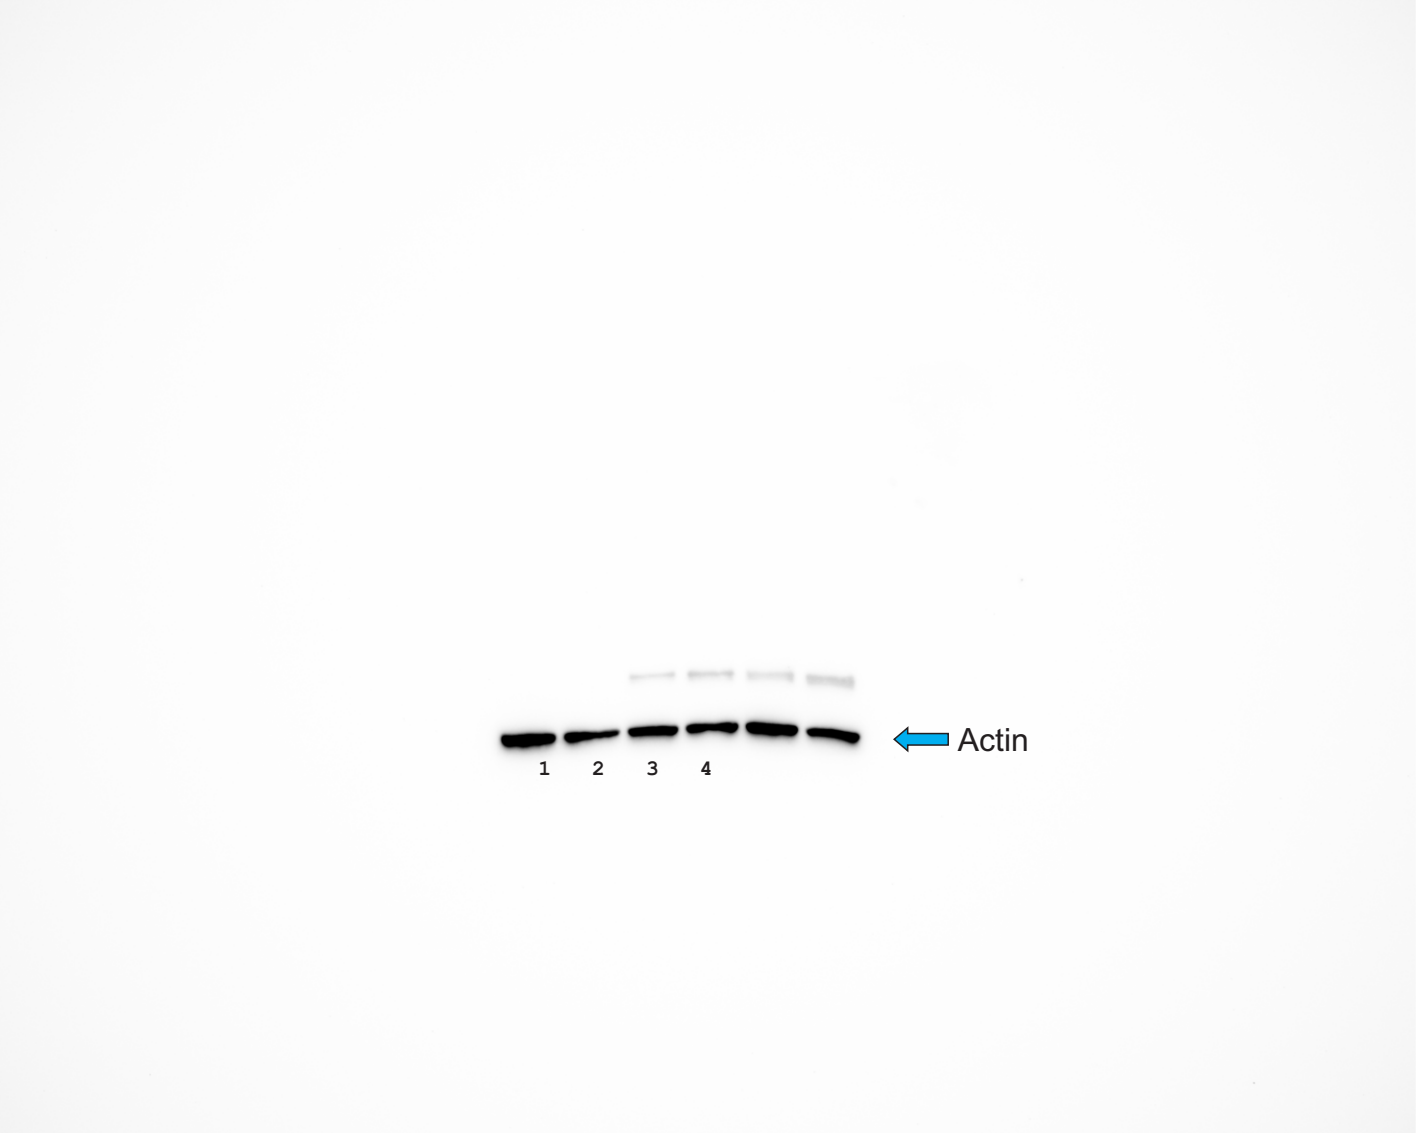

**Full and uncropped Western Blot for Figure 3A (XBP1s) [18h]**

Blots 1-4 are in the figure.

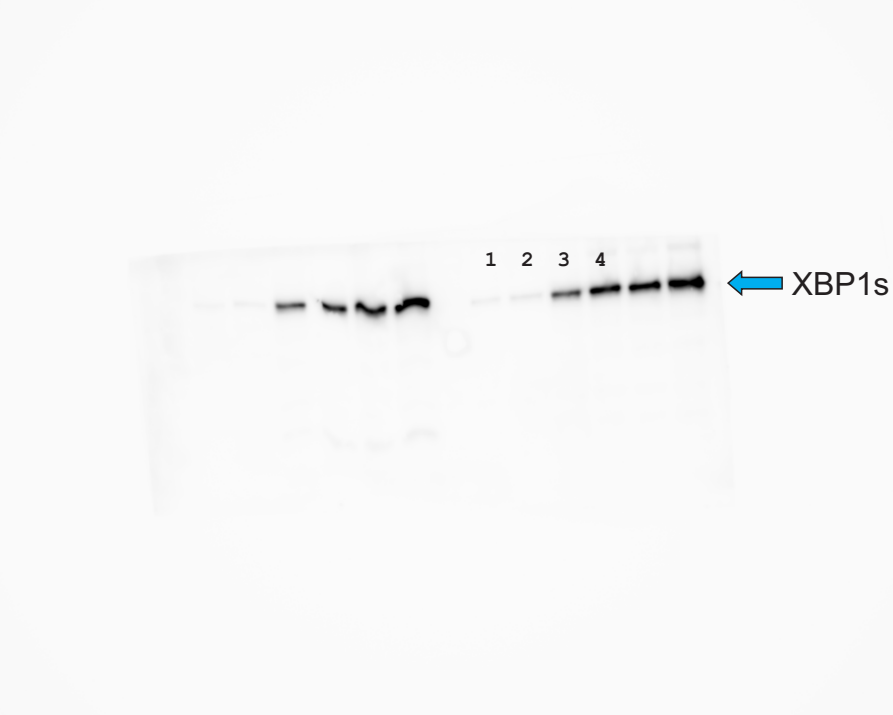

**Full and uncropped Western Blot for Figure 3A (Actin) [18h]**

Blots 1-4 are in the figure.

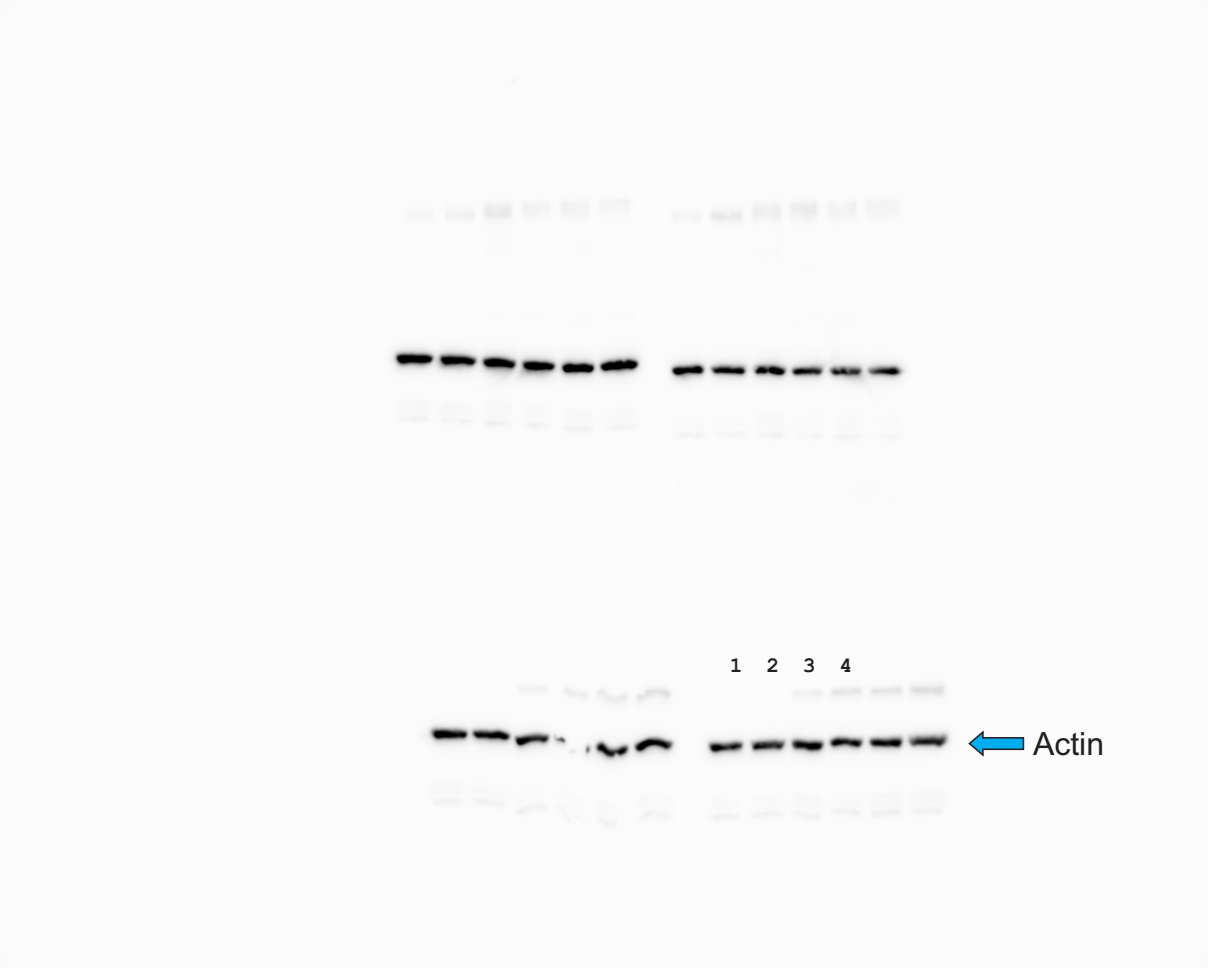

**Full and uncropped Western Blot for Figure 3B (XBP1s)**

Blots 1-4 are in the figure.

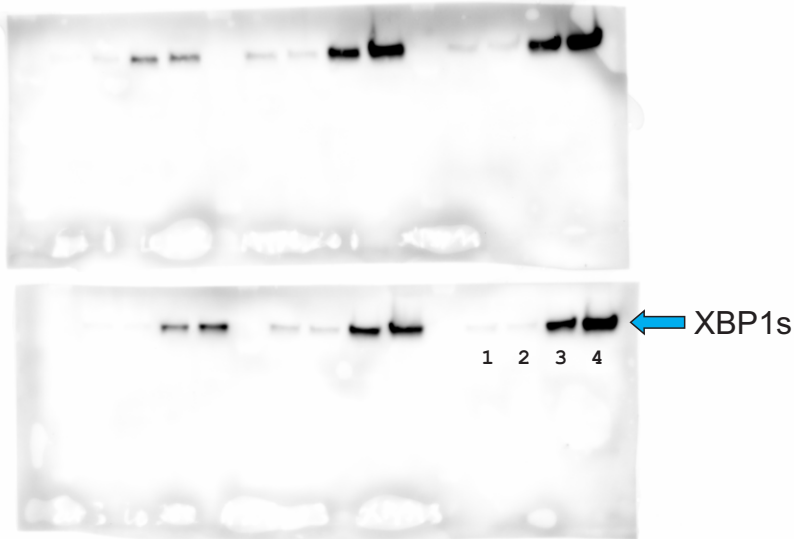

**Full and uncropped Western Blot for Figure 3B (Actin)**

Blots 1-4 are in the figure.

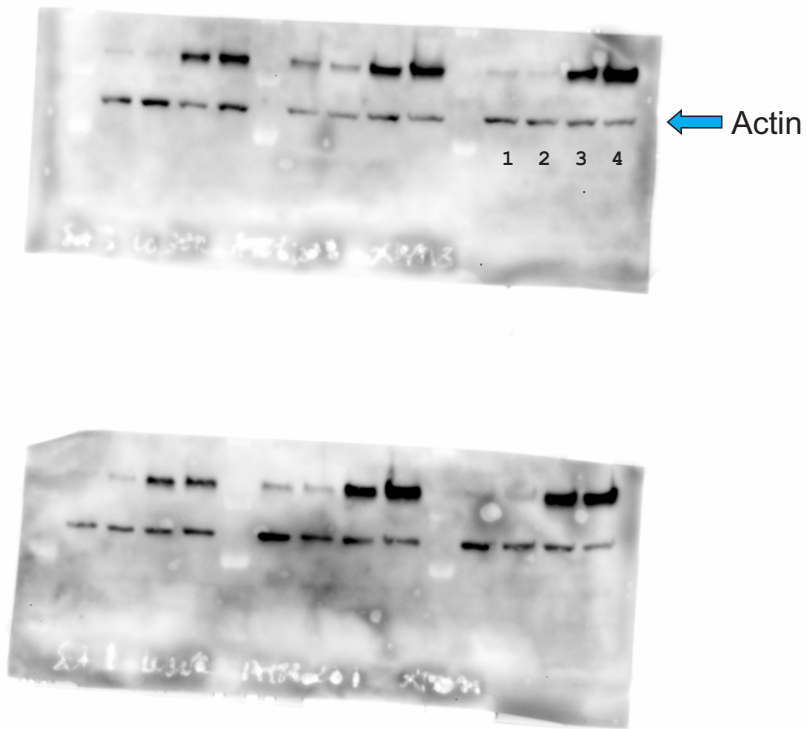

**Full and uncropped Western Blot for Figure 3C (XBP1s) [6h]**

Blots 1-4 are in the figure.

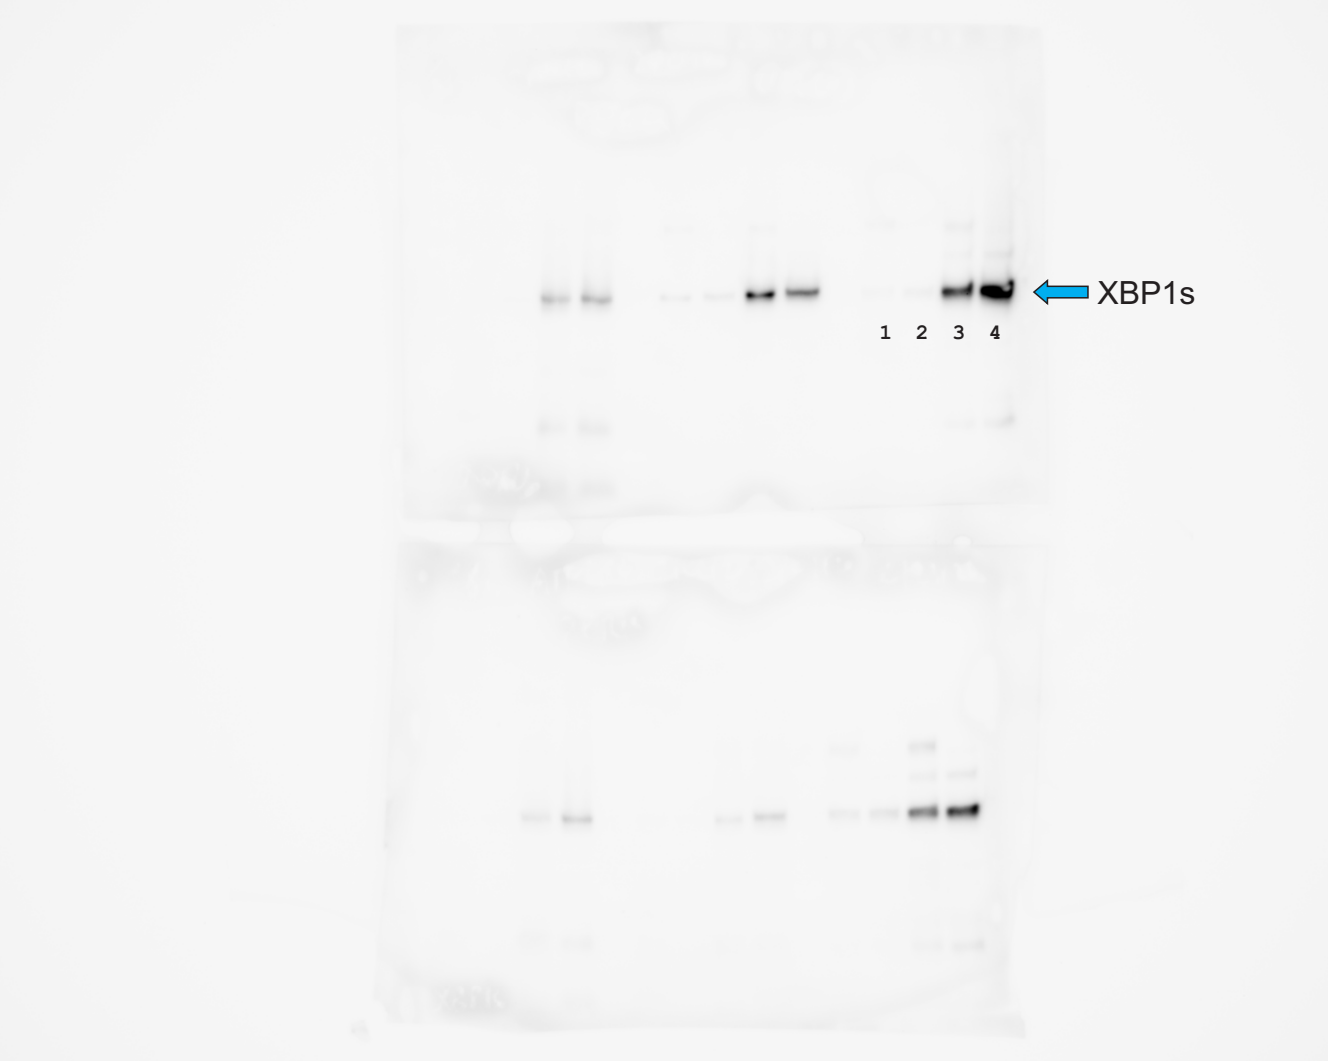

**Full and uncropped Western Blot for Figure 3C (Actin) [6h]**

Blots 1-4 are in the figure.

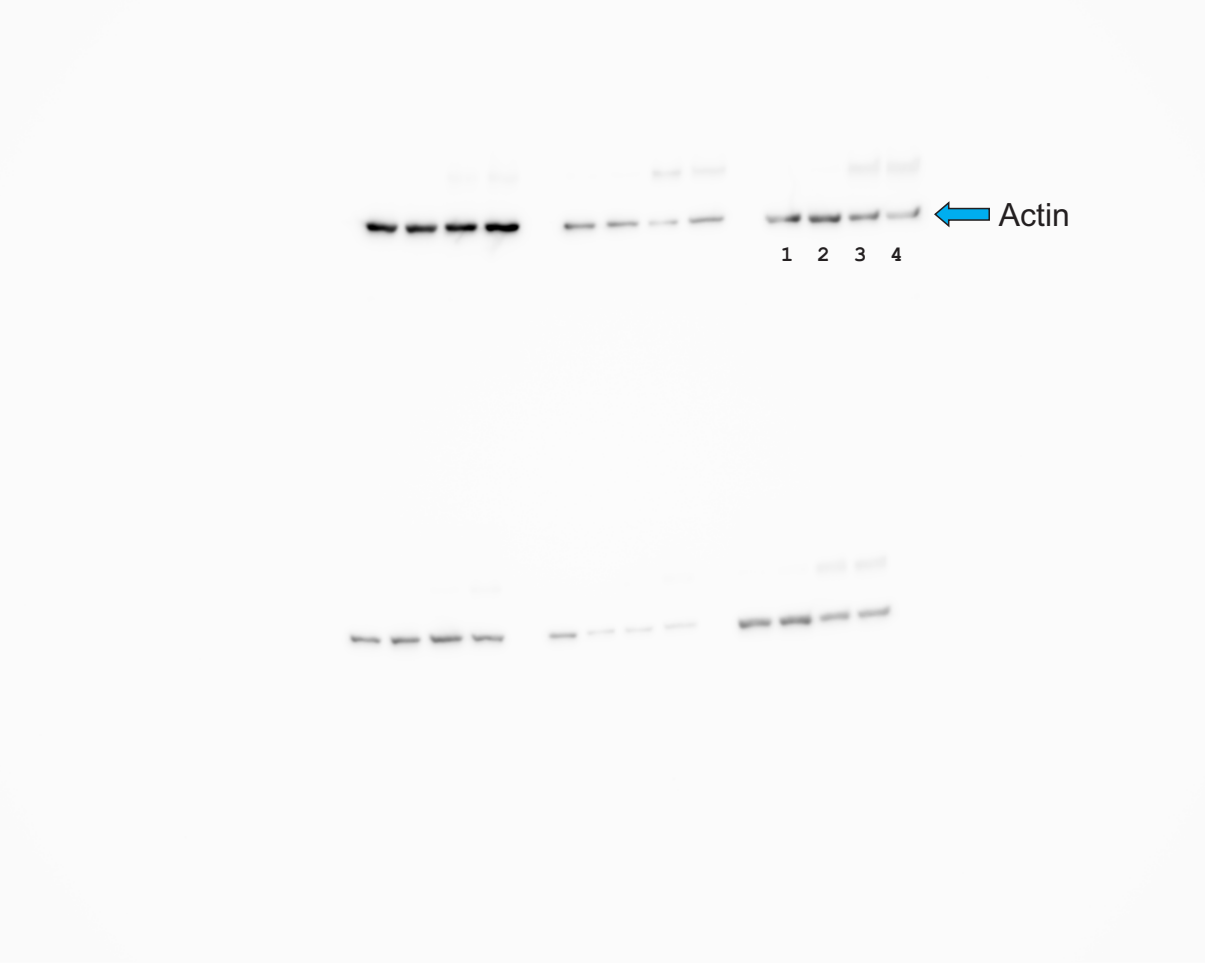

**Full and uncropped Western Blot for Figure 3C (XBP1s) [18h]**

Blots 1-4 are in the figure.

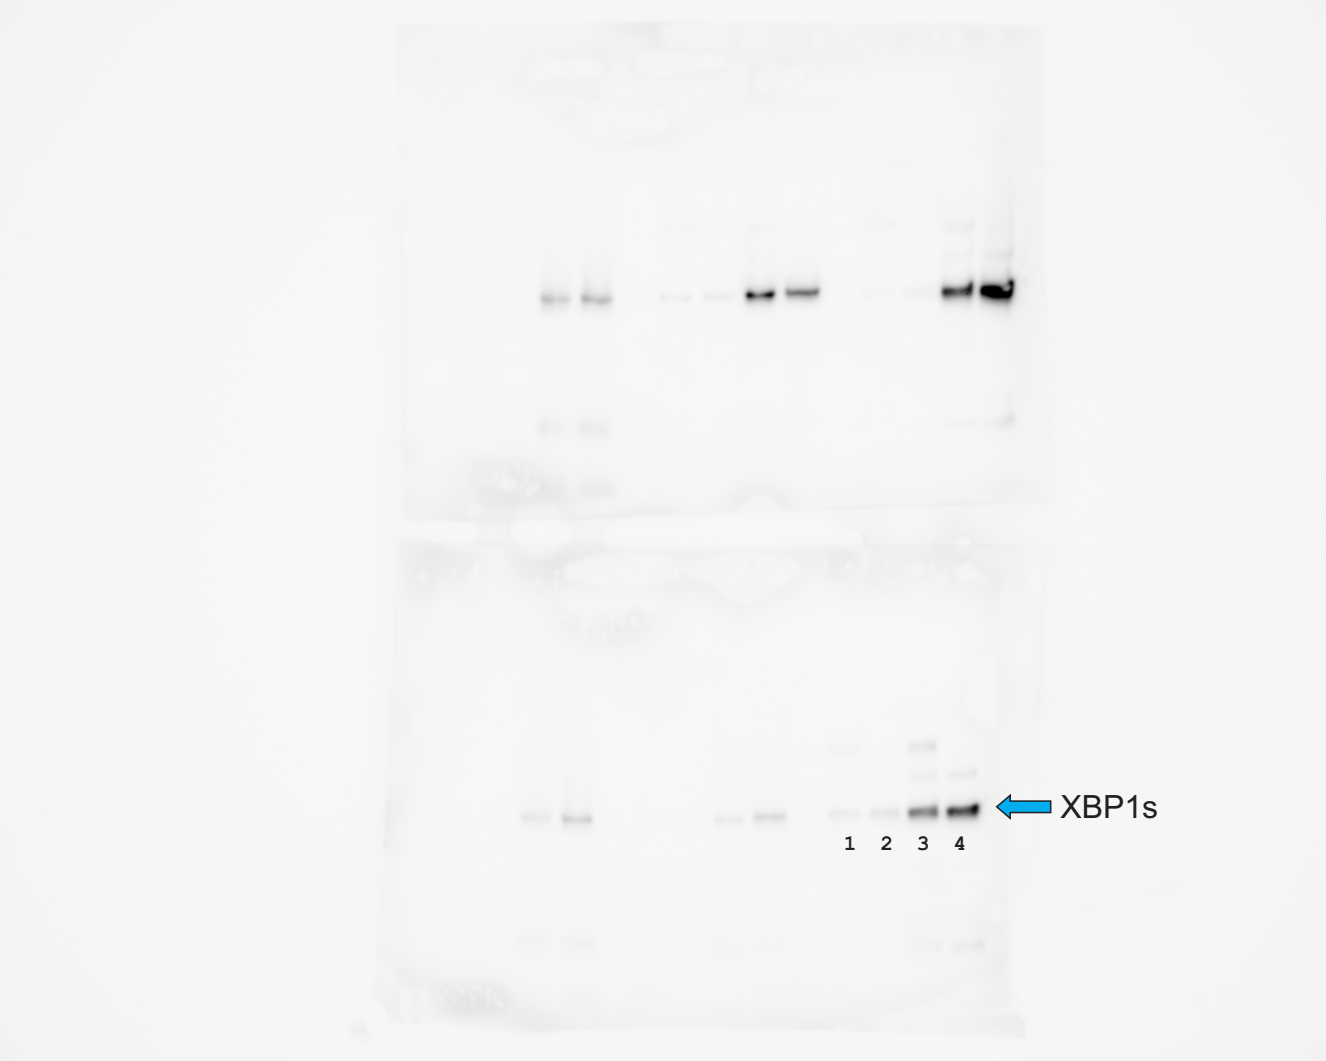

**Full and uncropped Western Blot for Figure 3C (Actin) [18h]**

Blots 1-4 are in the figure.

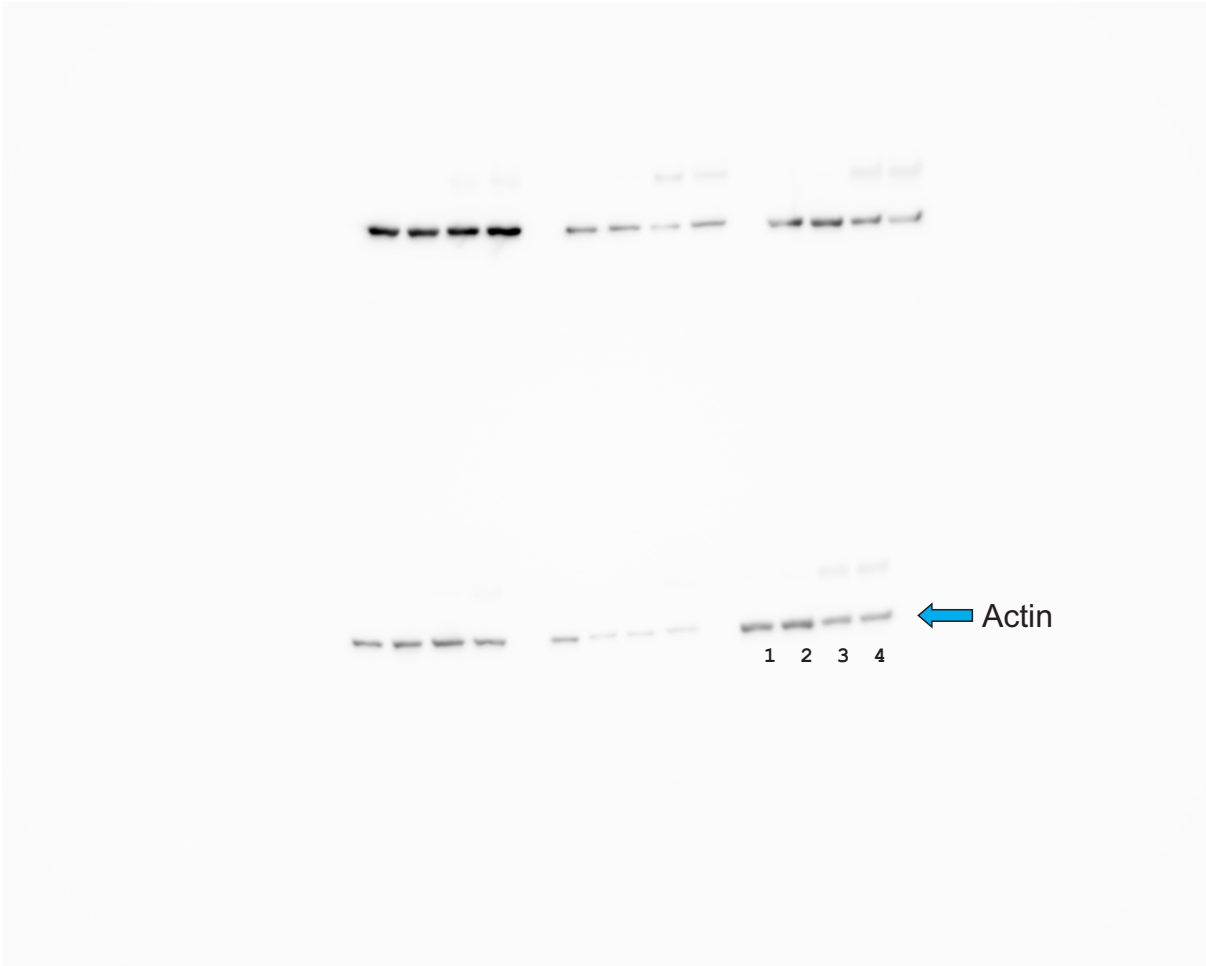

**Full and uncropped Western Blot for Figure 5A (ATF6)**

Blots 1-2 are in the figure.

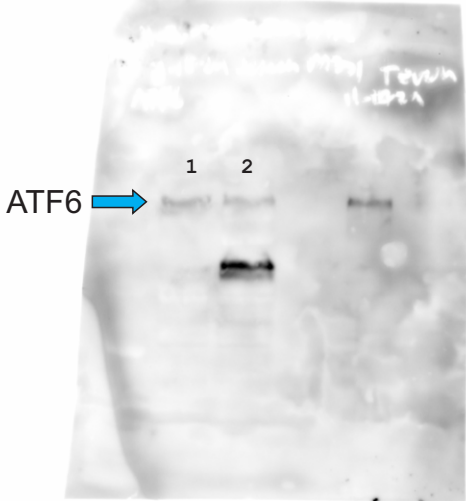

**Full and uncropped Western Blot for Figure 5A (ATF6N)**

Blots 1-2 are in the figure.

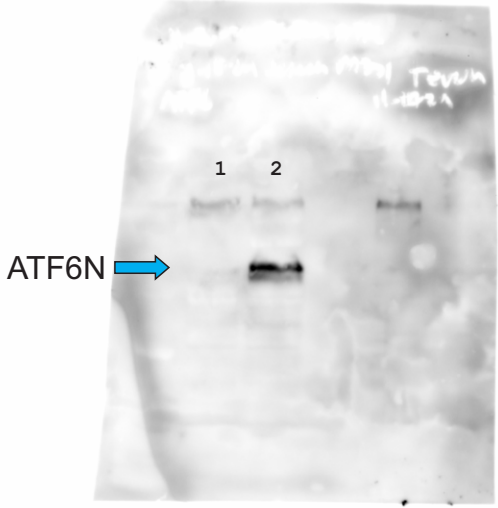

**Full and uncropped Western Blot for Figure 5A (Actin)**

Blots 1-2 are in the figure.

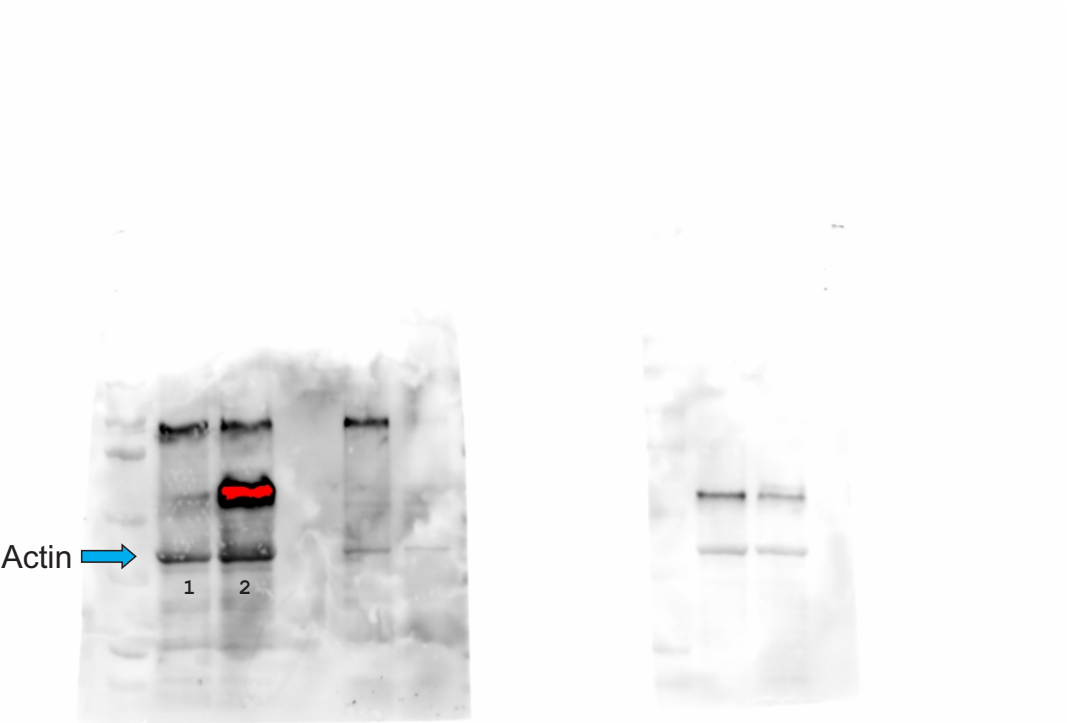

**Full and uncropped Western Blot for Figure 5A (XBP1s)**

Blots 1-2 are in the figure.

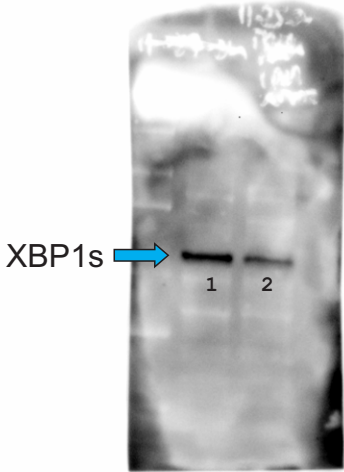

**Full and uncropped Western Blot for Figure 5A (Actin)**

Blots 1-2 are in the figure.

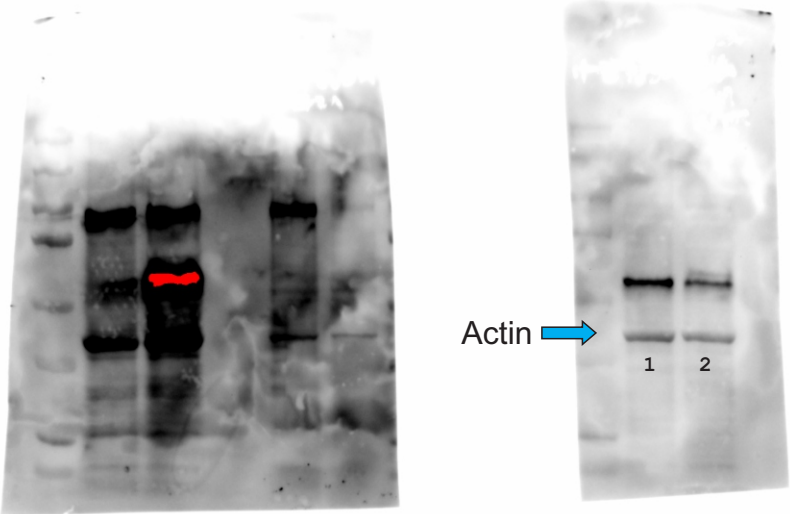

**Full and uncropped Western Blot for Figure 5D (ATF6N)**

Blots 1-2 are in the figure.

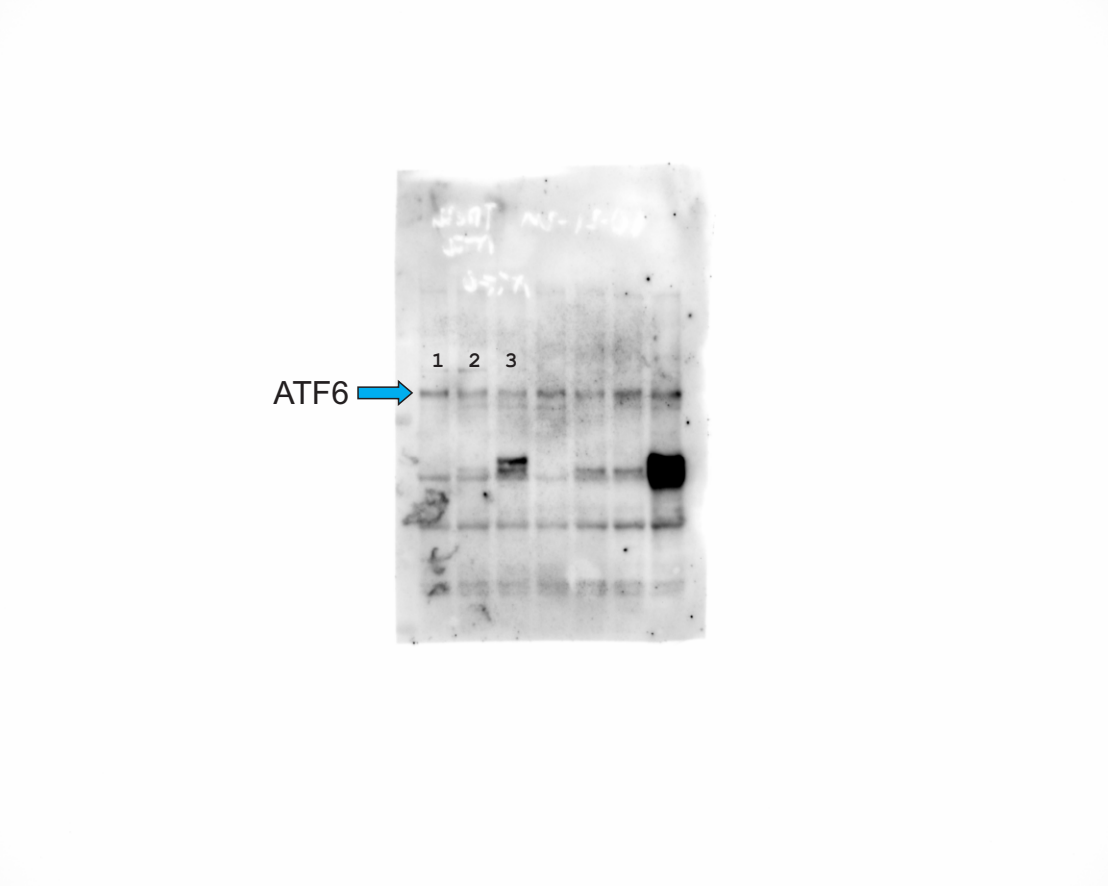

**Full and uncropped Western Blot for Figure 5D (ATF6N)**

Blots 1-2 are in the figure.

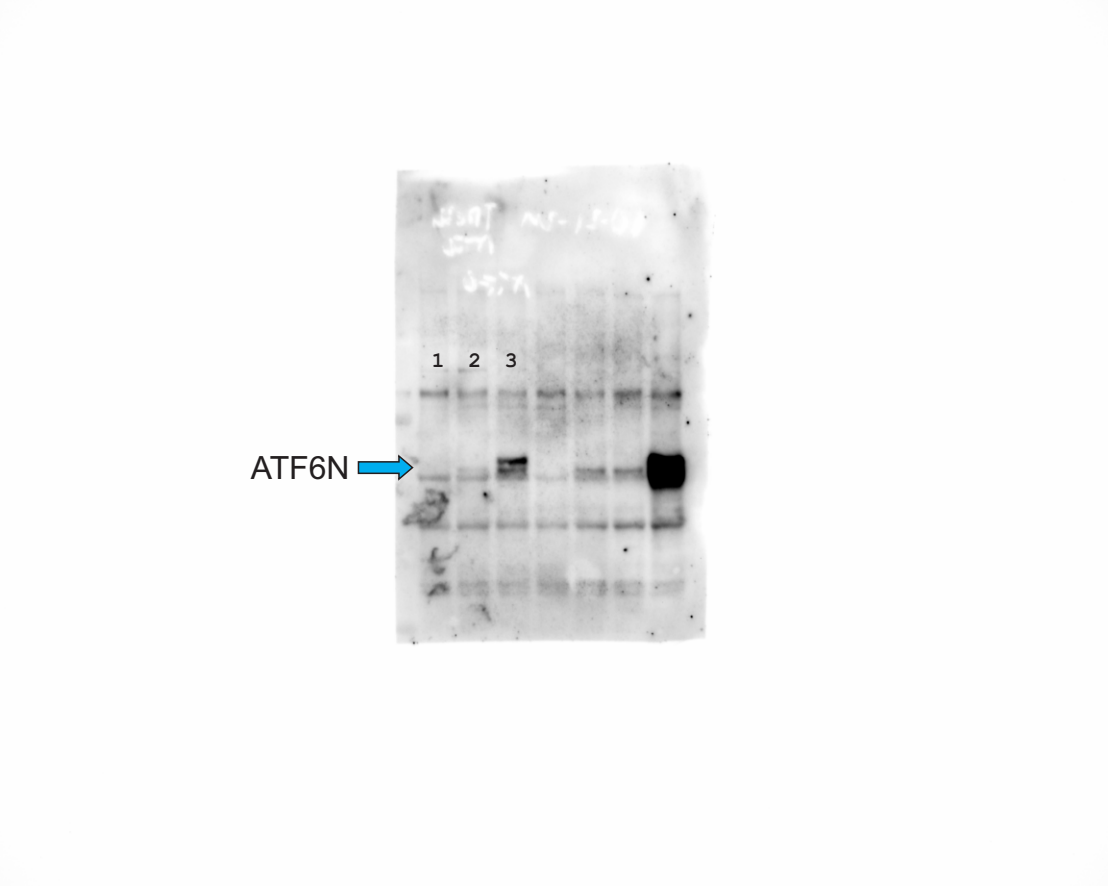

**Full and uncropped Western Blot for Figure 5D (Actin)**

Blots 1-2 are in the figure.

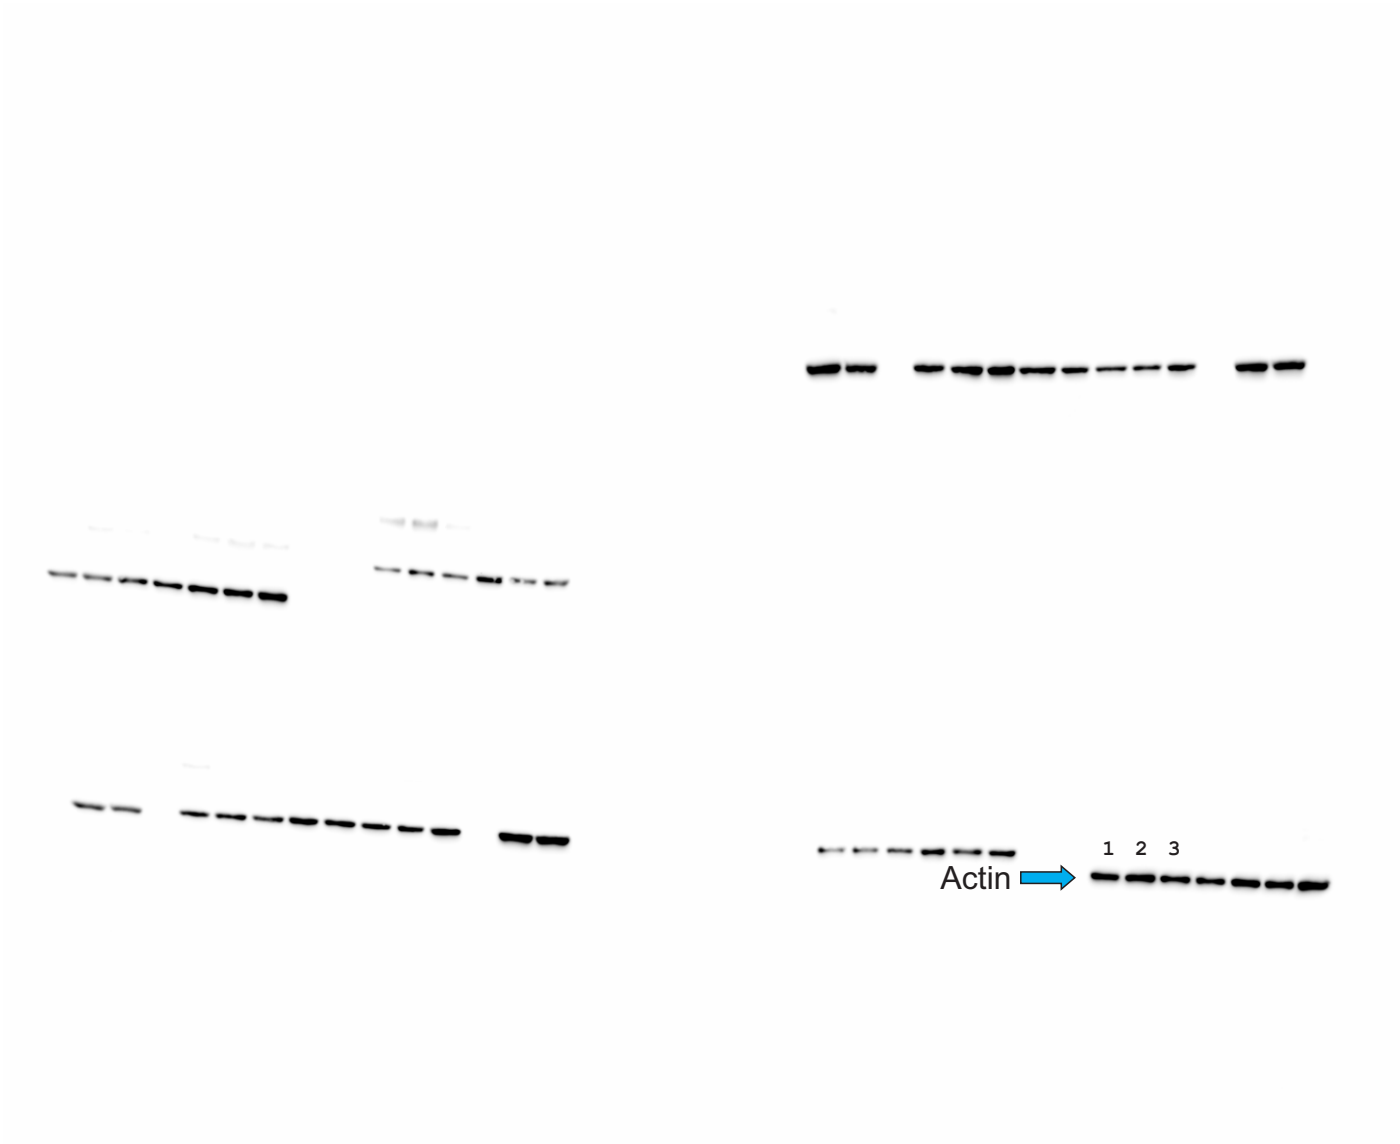

**Full and uncropped Western Blot for Figure 5D (XBP1s)**  
Blots 1-2 are in the figure.

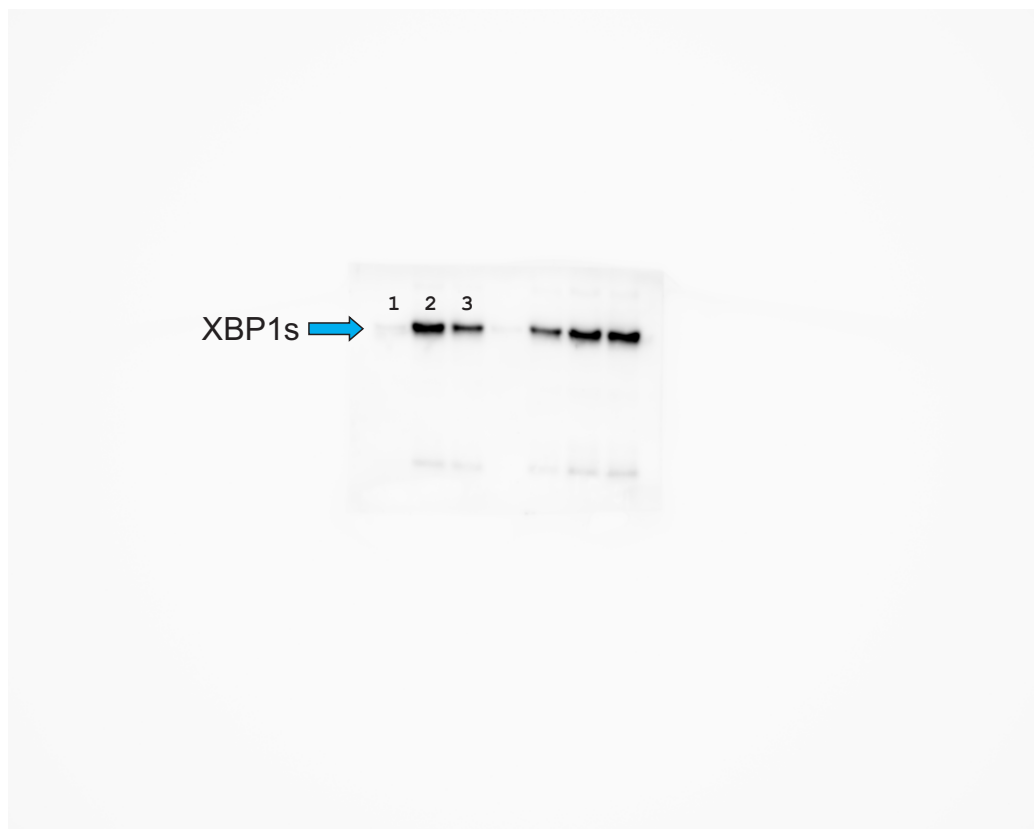

**Full and uncropped Western Blot for Figure 5D (Actin)**

Blots 1-2 are in the figure.

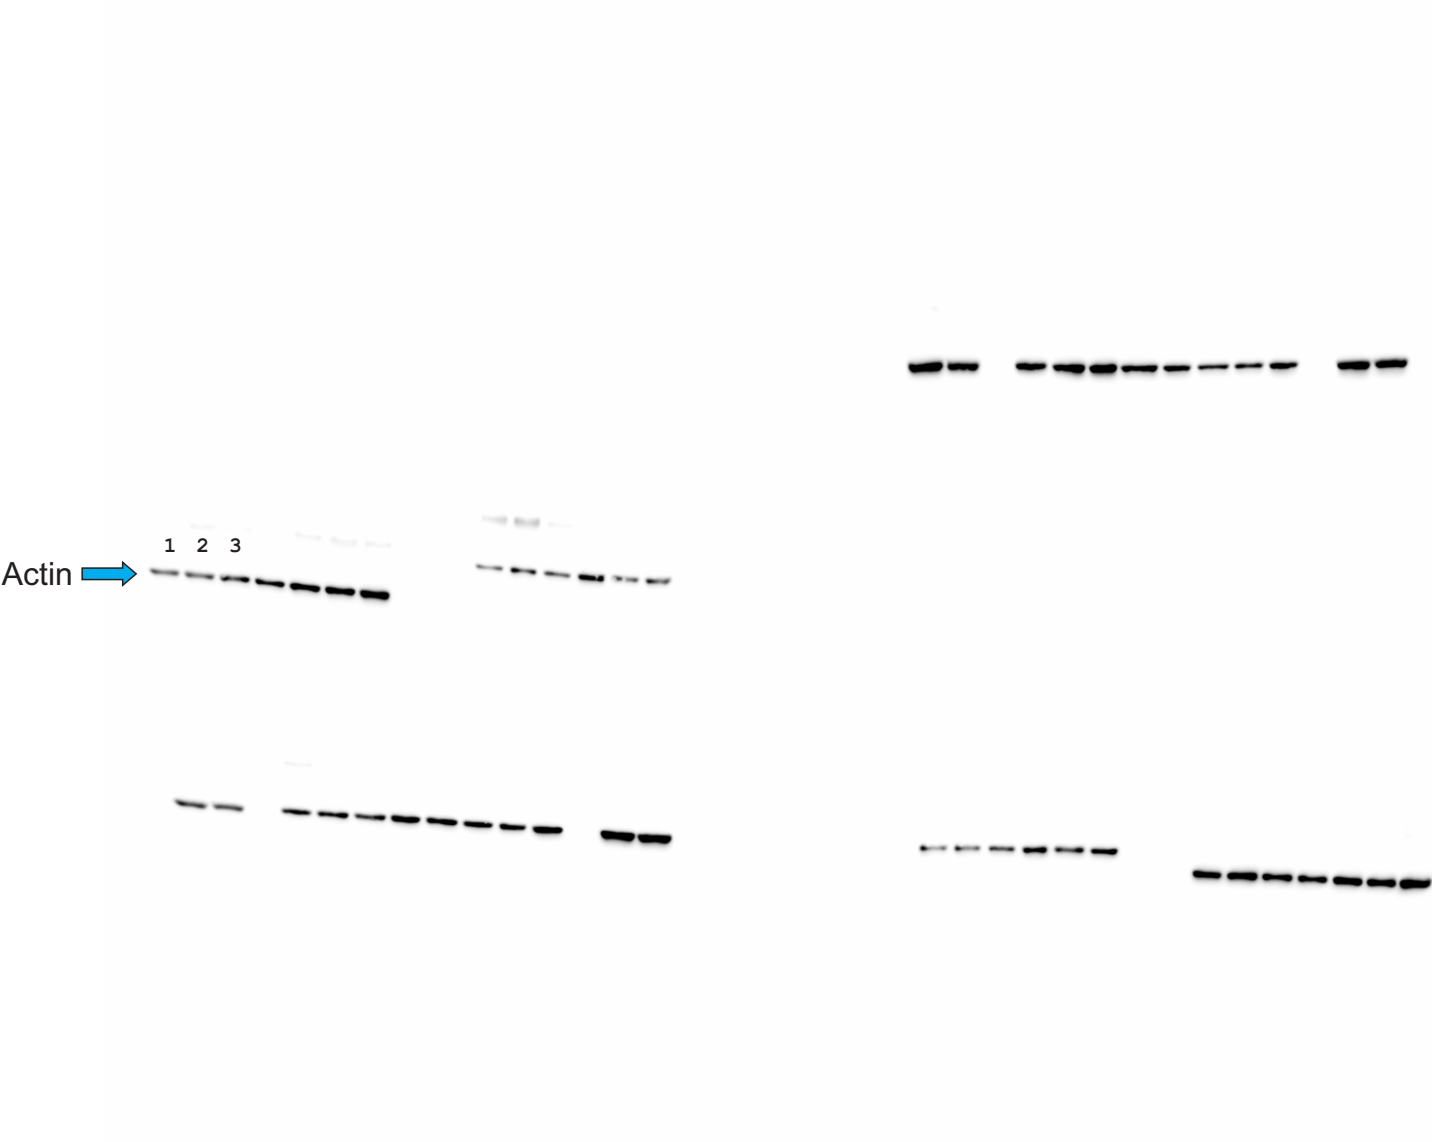

**Full and uncropped Western Blot for Figure 6A (PERK)**

Blots 1-4 are in the figure.

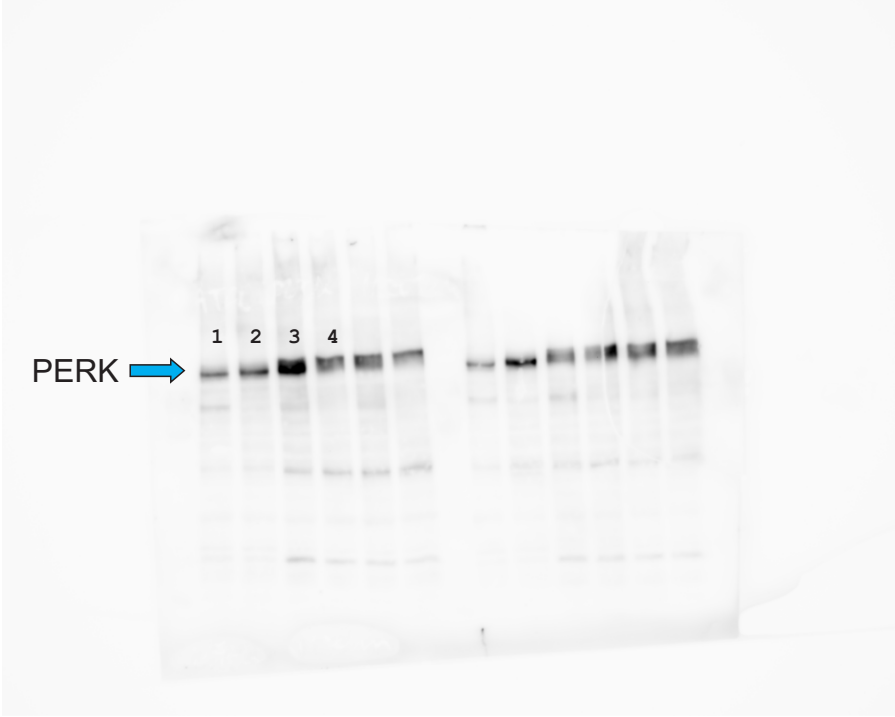

**Full and uncropped Western Blot for Figure 6A (Actin)**

Blots 1-4 are in the figure.

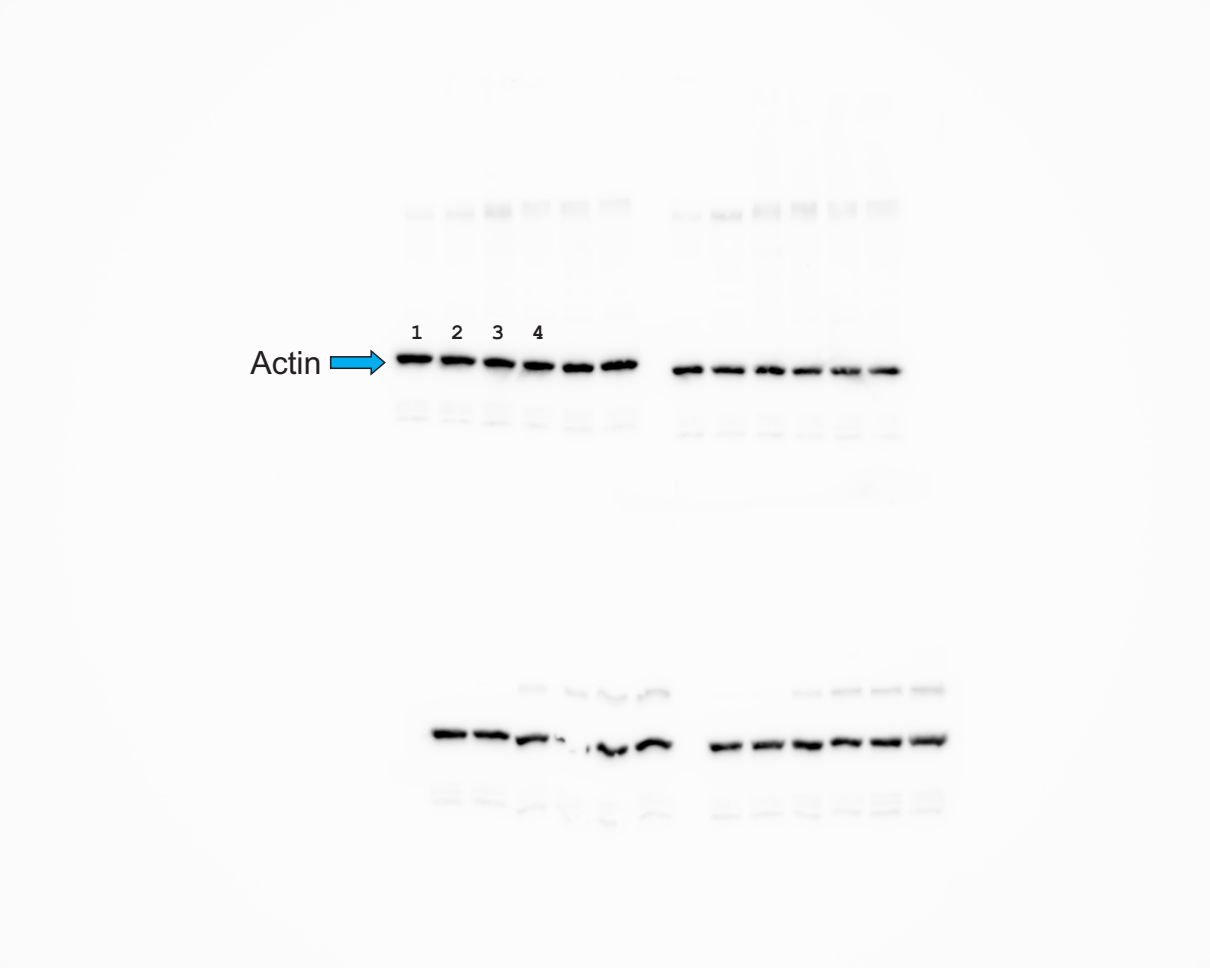

**Full and uncropped Western Blot for Figure 6B (PERK)**

Blots 1-4 are in the figure.

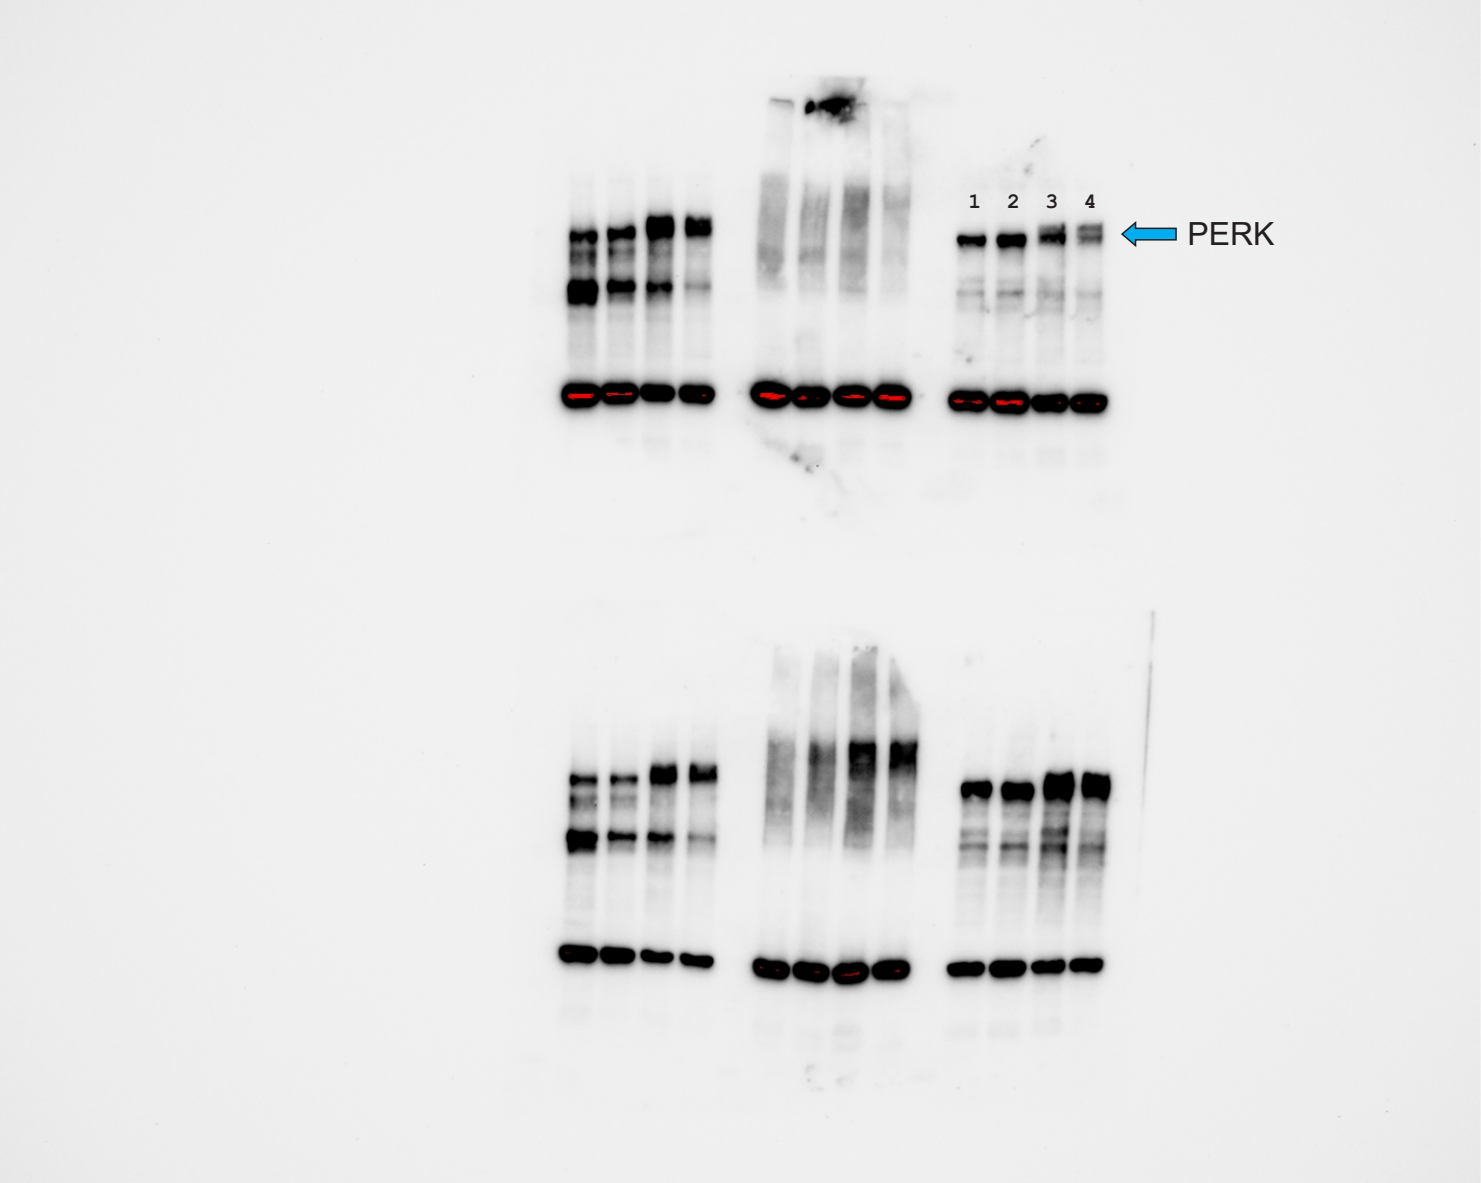

**Full and uncropped Western Blot for Figure 6B (Actin)**

Blots 1-4 are in the figure.

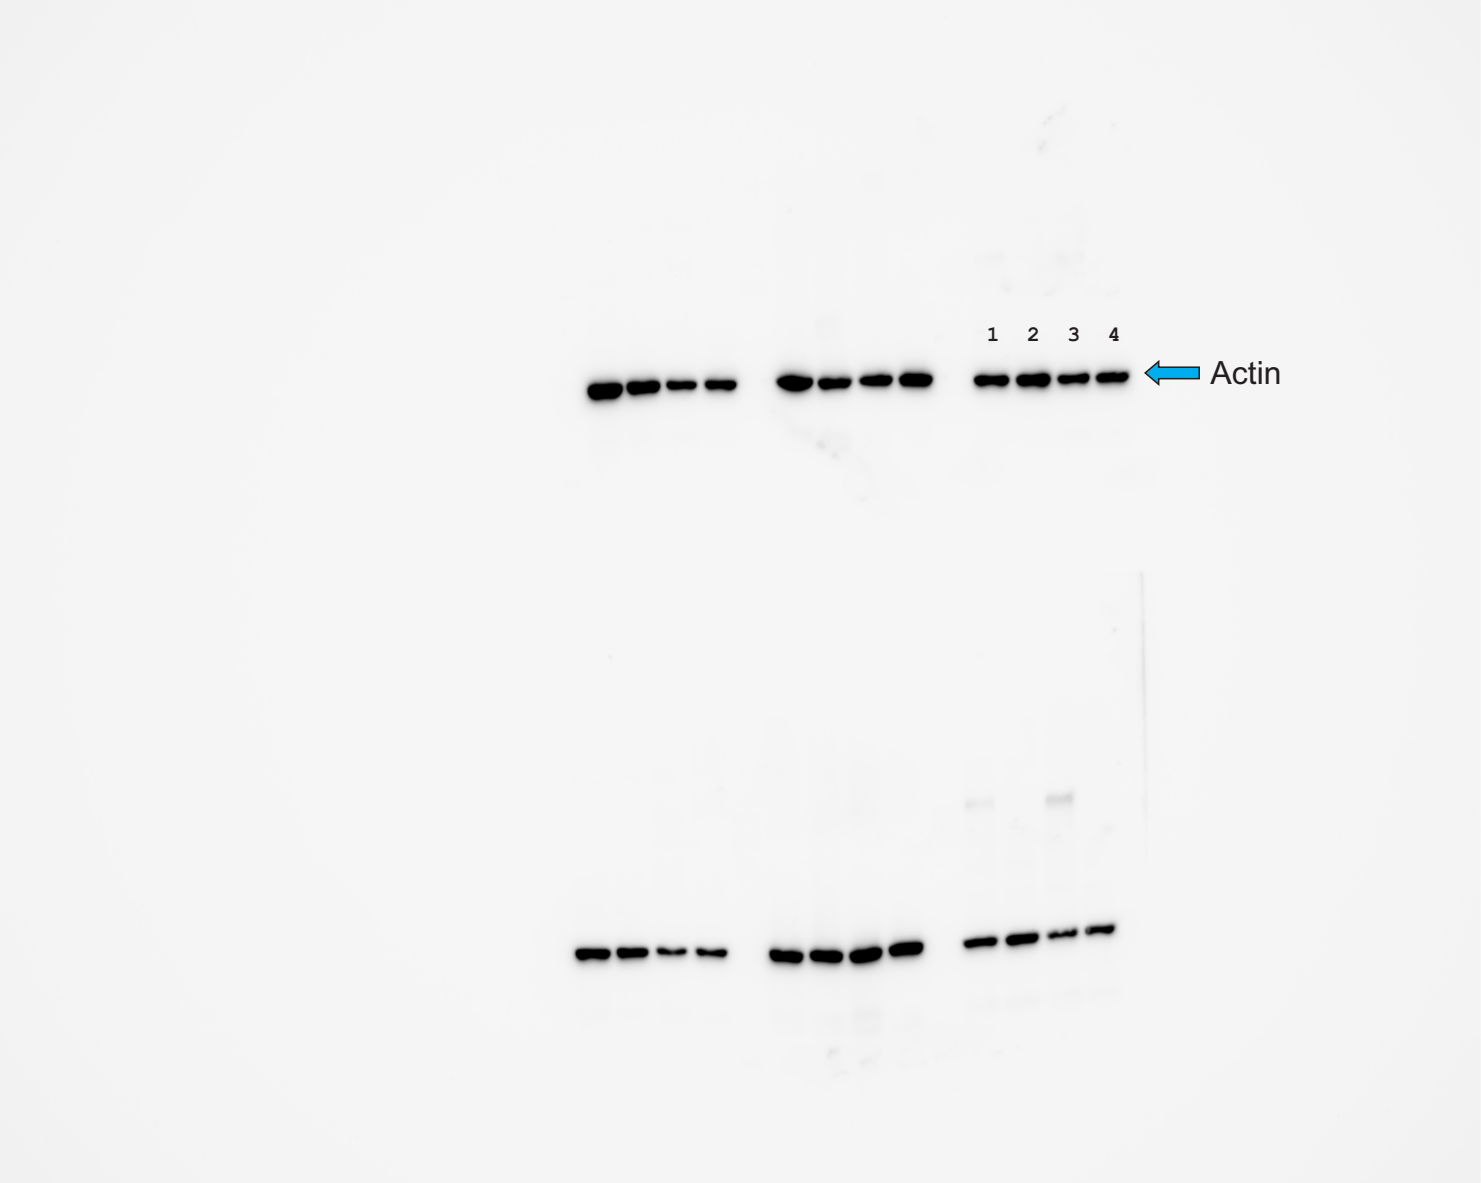

**Full and uncropped Western Blot for Figure 6D (PERK)**

Blots 1-2 are in the figure.

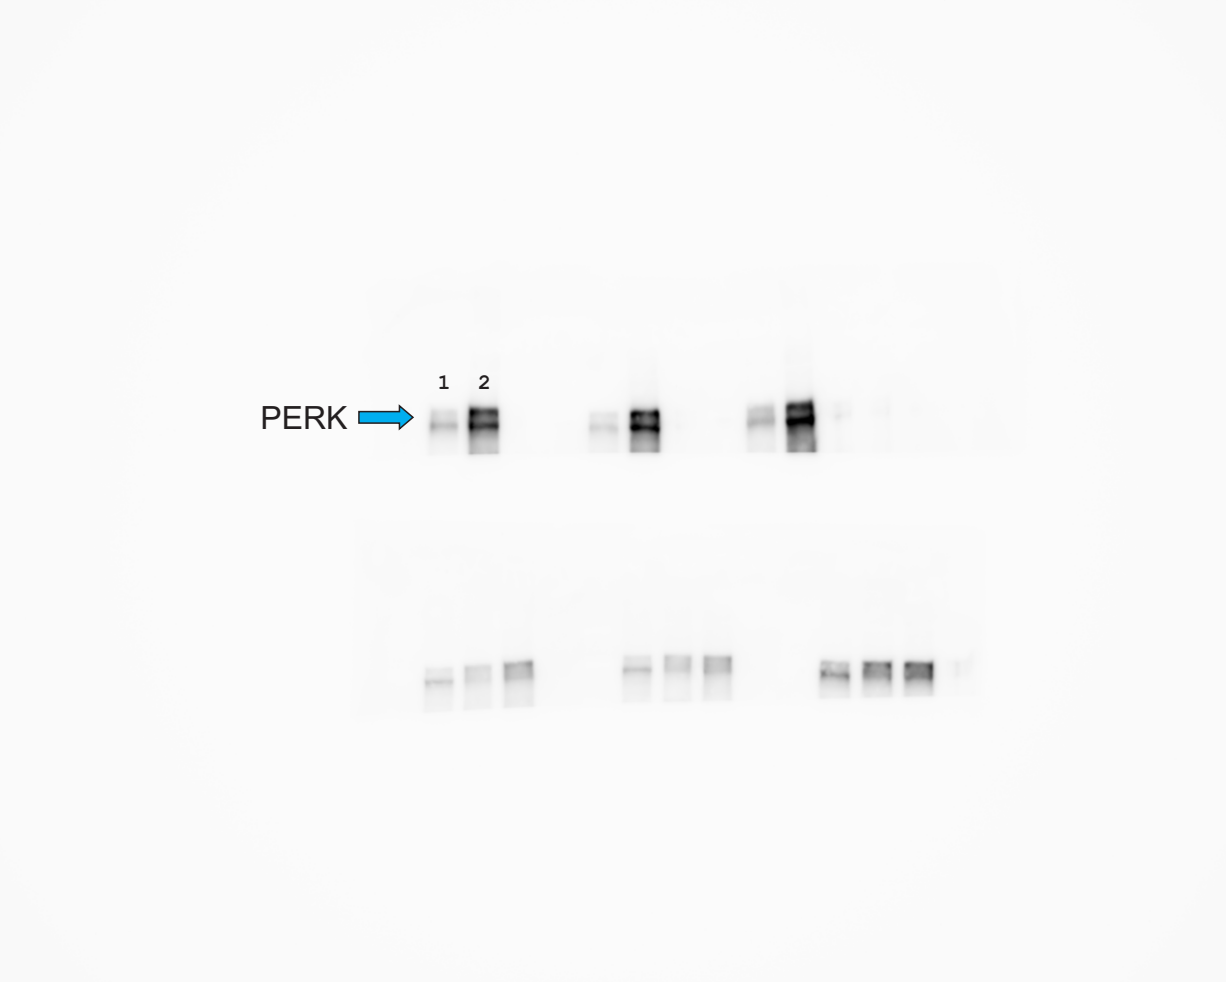

**Full and uncropped Western Blot for Figure 6D (P-eIF2 $\alpha$ )**

Blots 1-2 are in the figure.

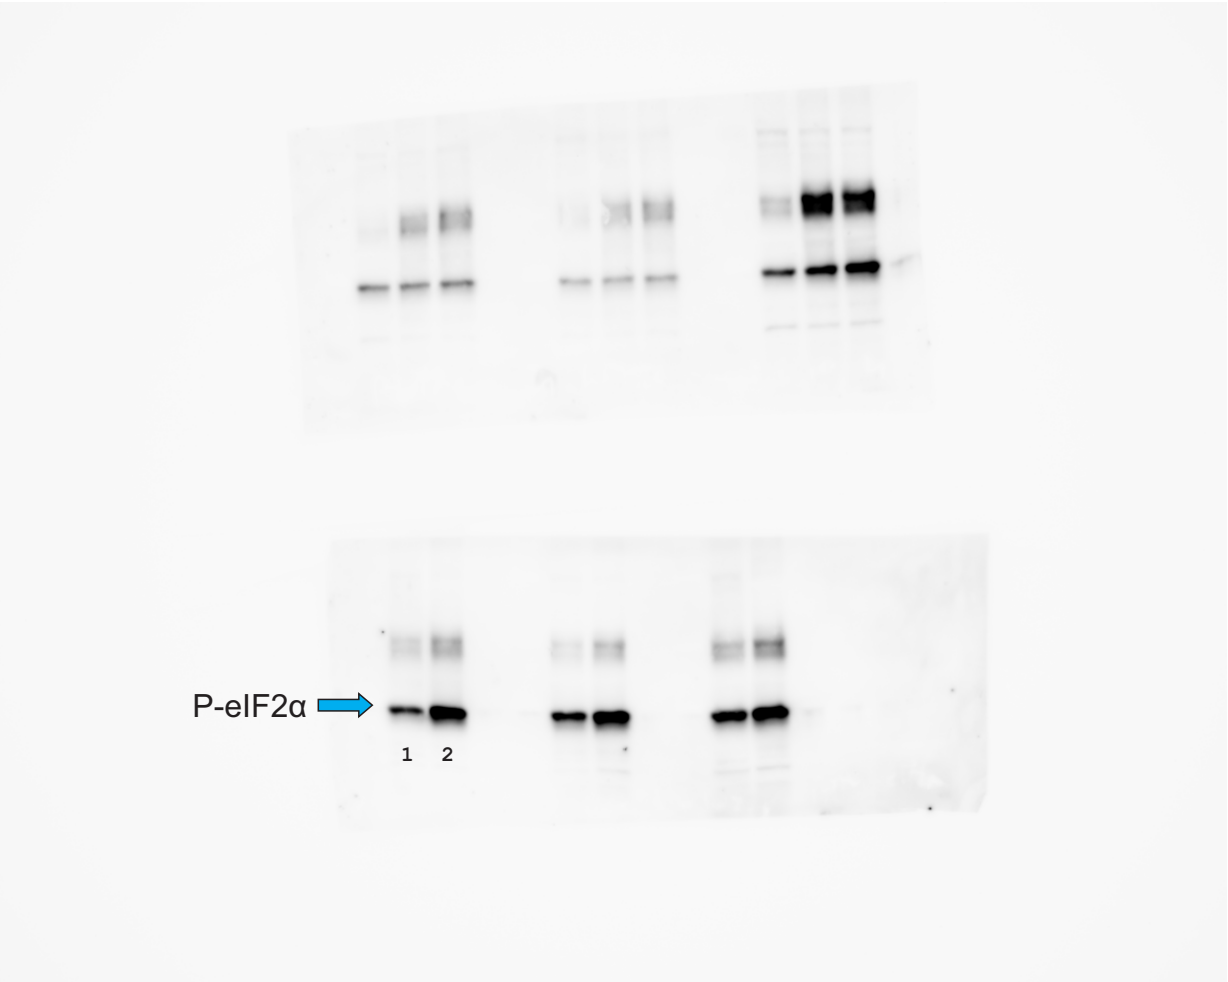

**Full and uncropped Western Blot for Figure 6D (ATF4)**  
Blots 1-2 are in the figure.

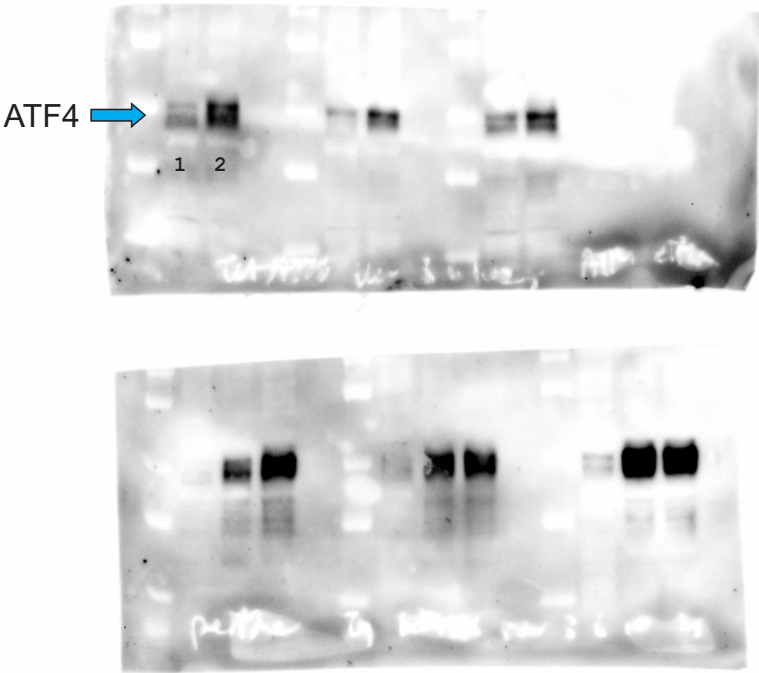

**Full and uncropped Western Blot for Figure 6D (Actin)**

Blots 1-2 are in the figure.

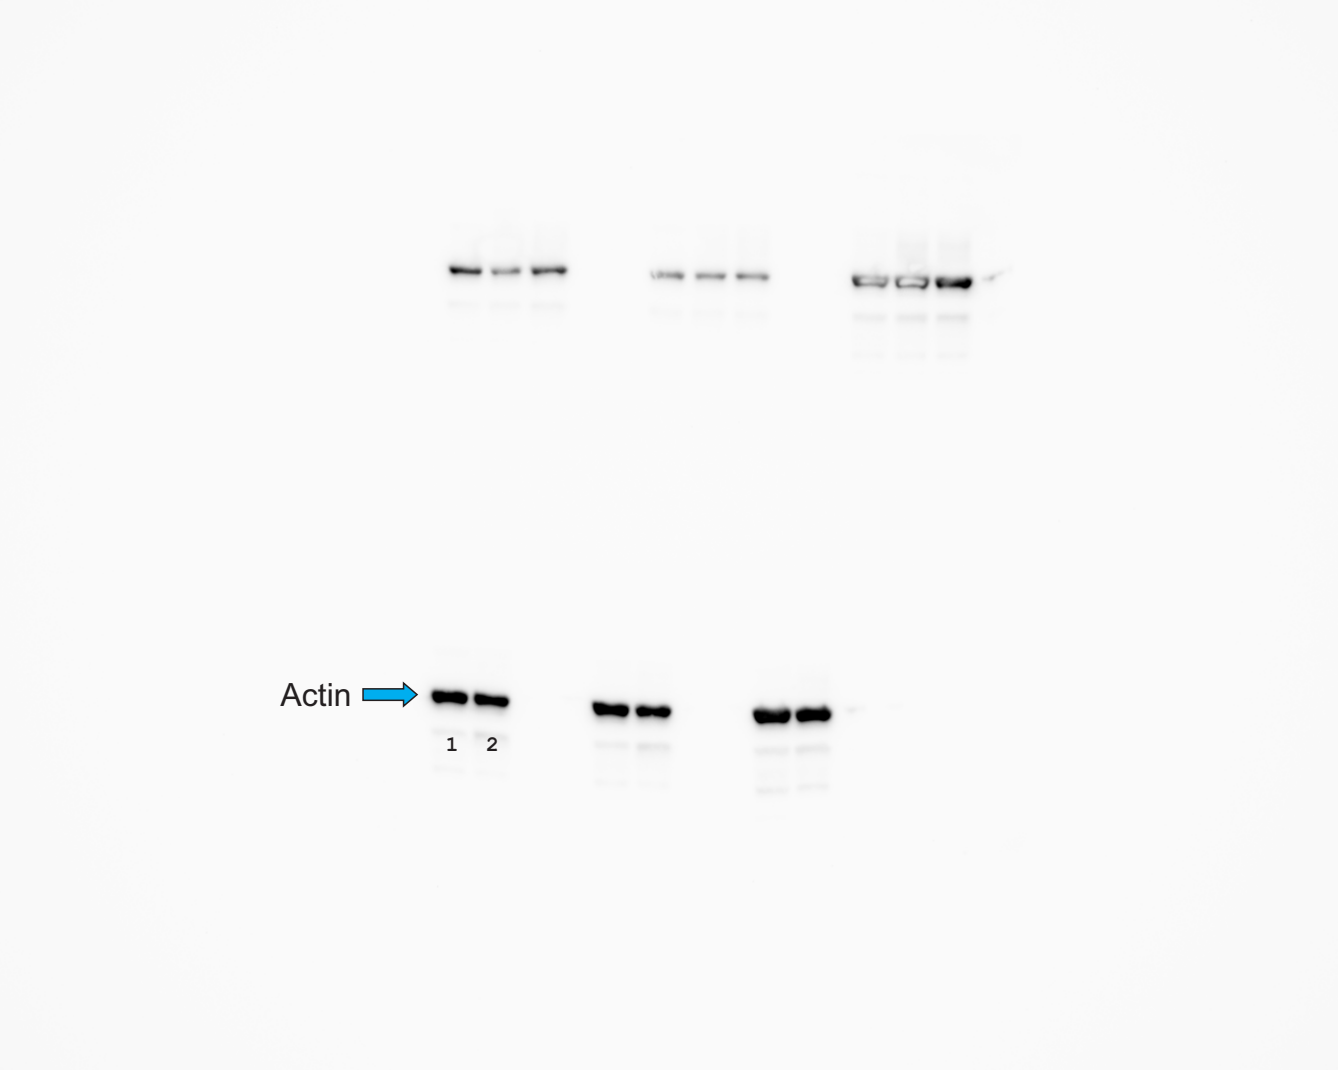

**Full and uncropped Western Blot for Figure 6D (ATF6)**  
Blots 1-2 are in the figure.

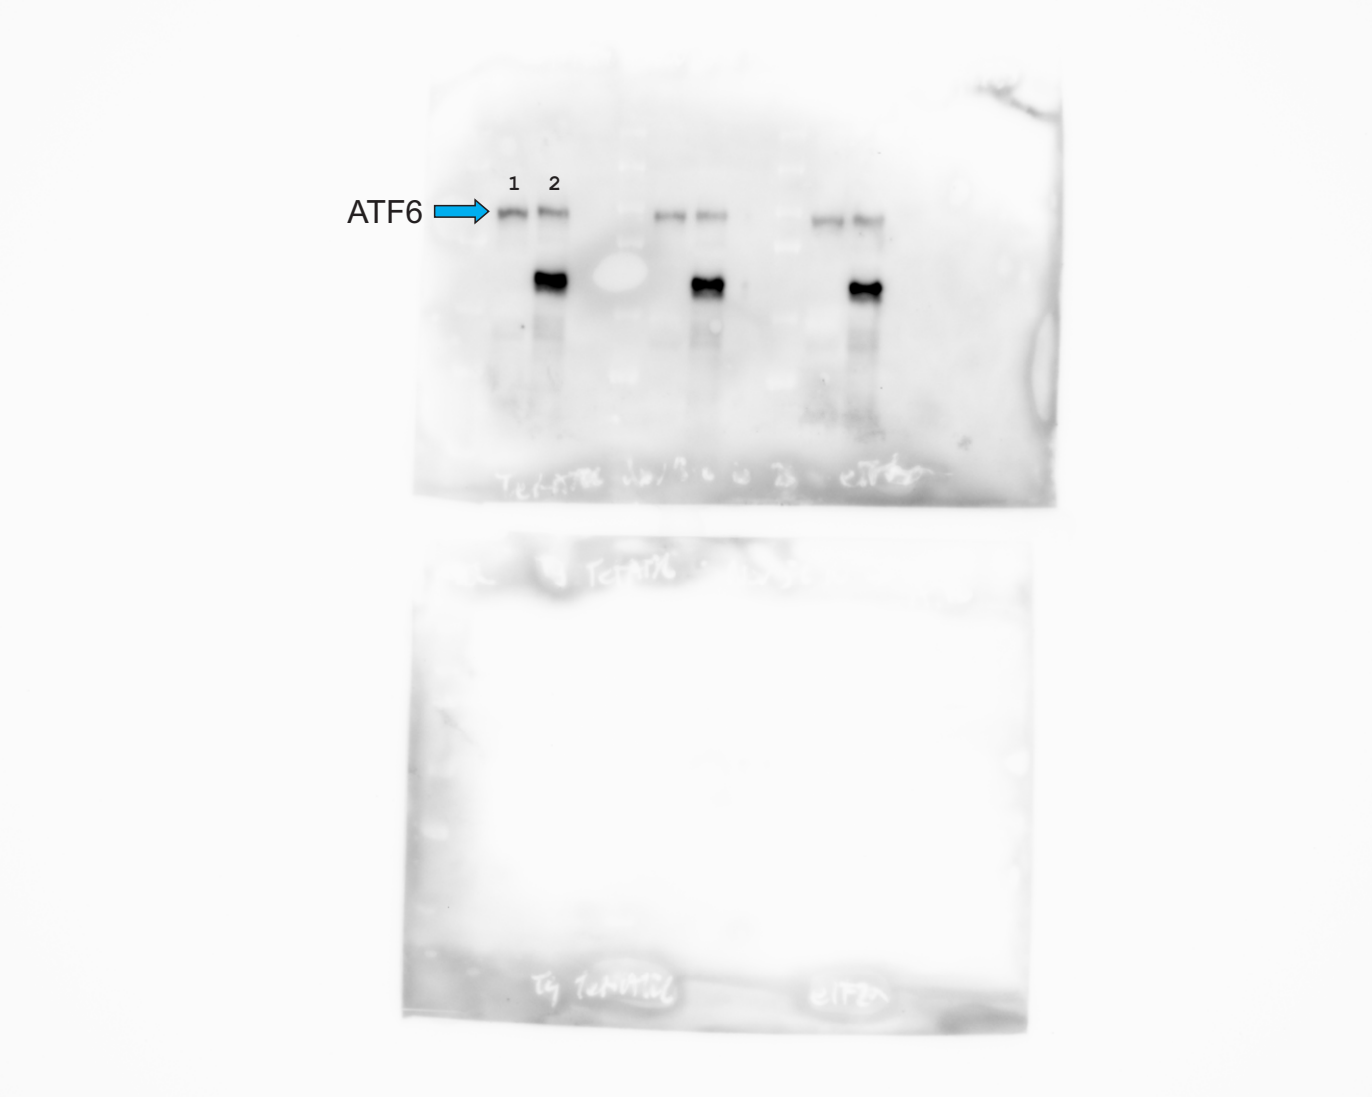

**Full and uncropped Western Blot for Figure 6D (ATF6N)**

Blots 1-2 are in the figure.

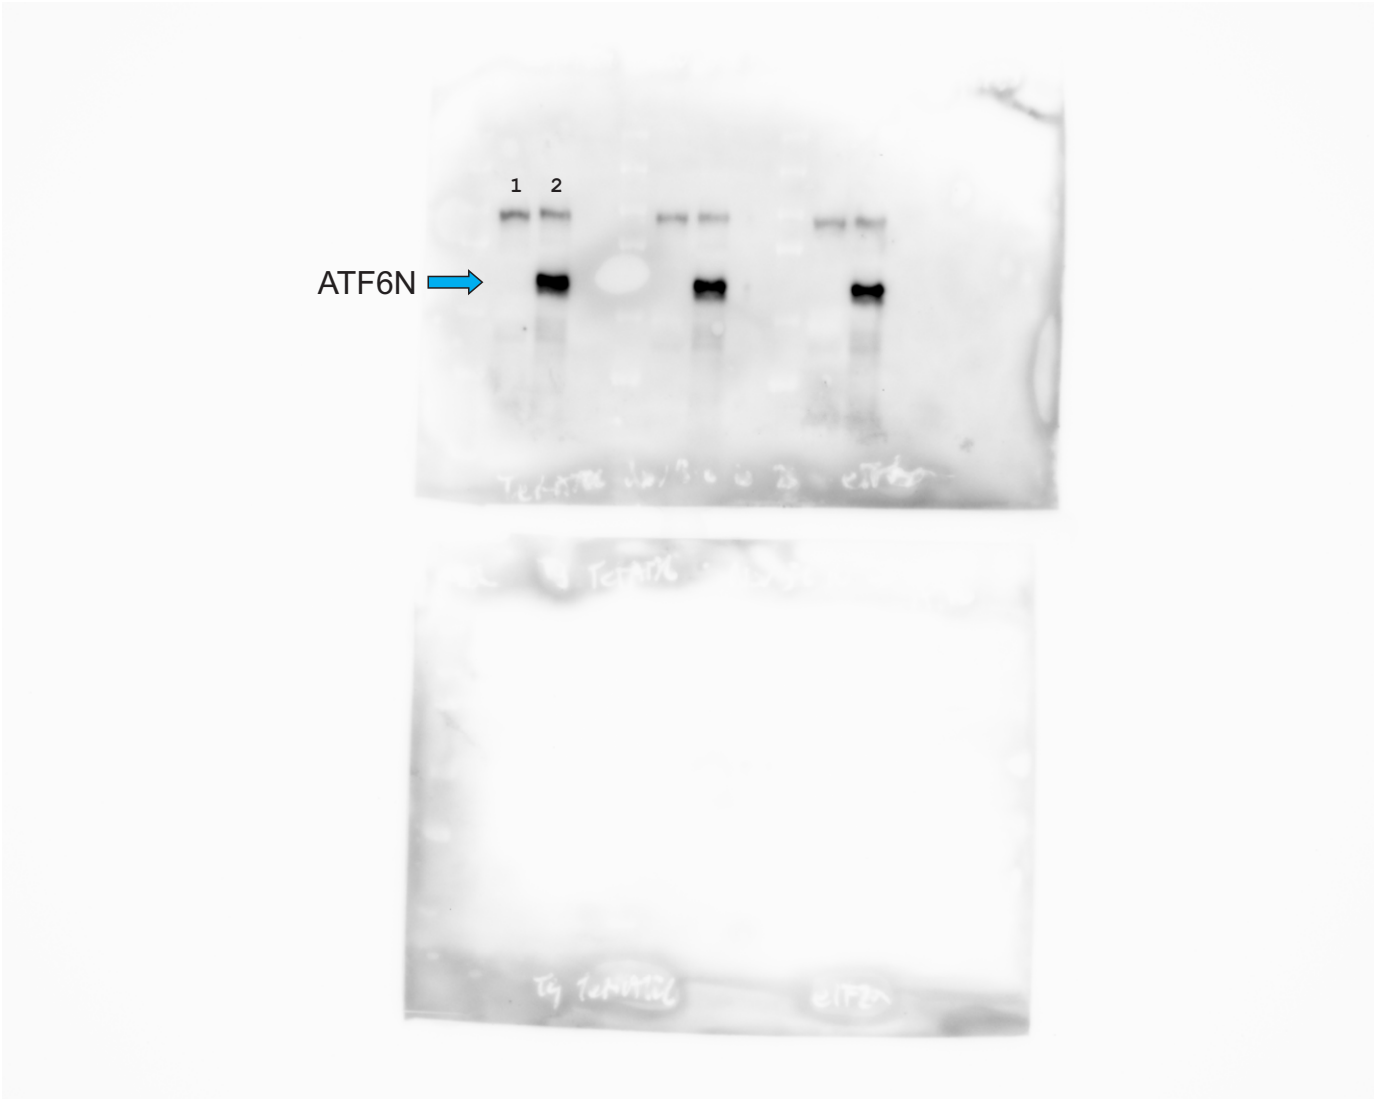

**Full and uncropped Western Blot for Figure 6D (eIF2 $\alpha$ )**

Blots 1-2 are in the figure.

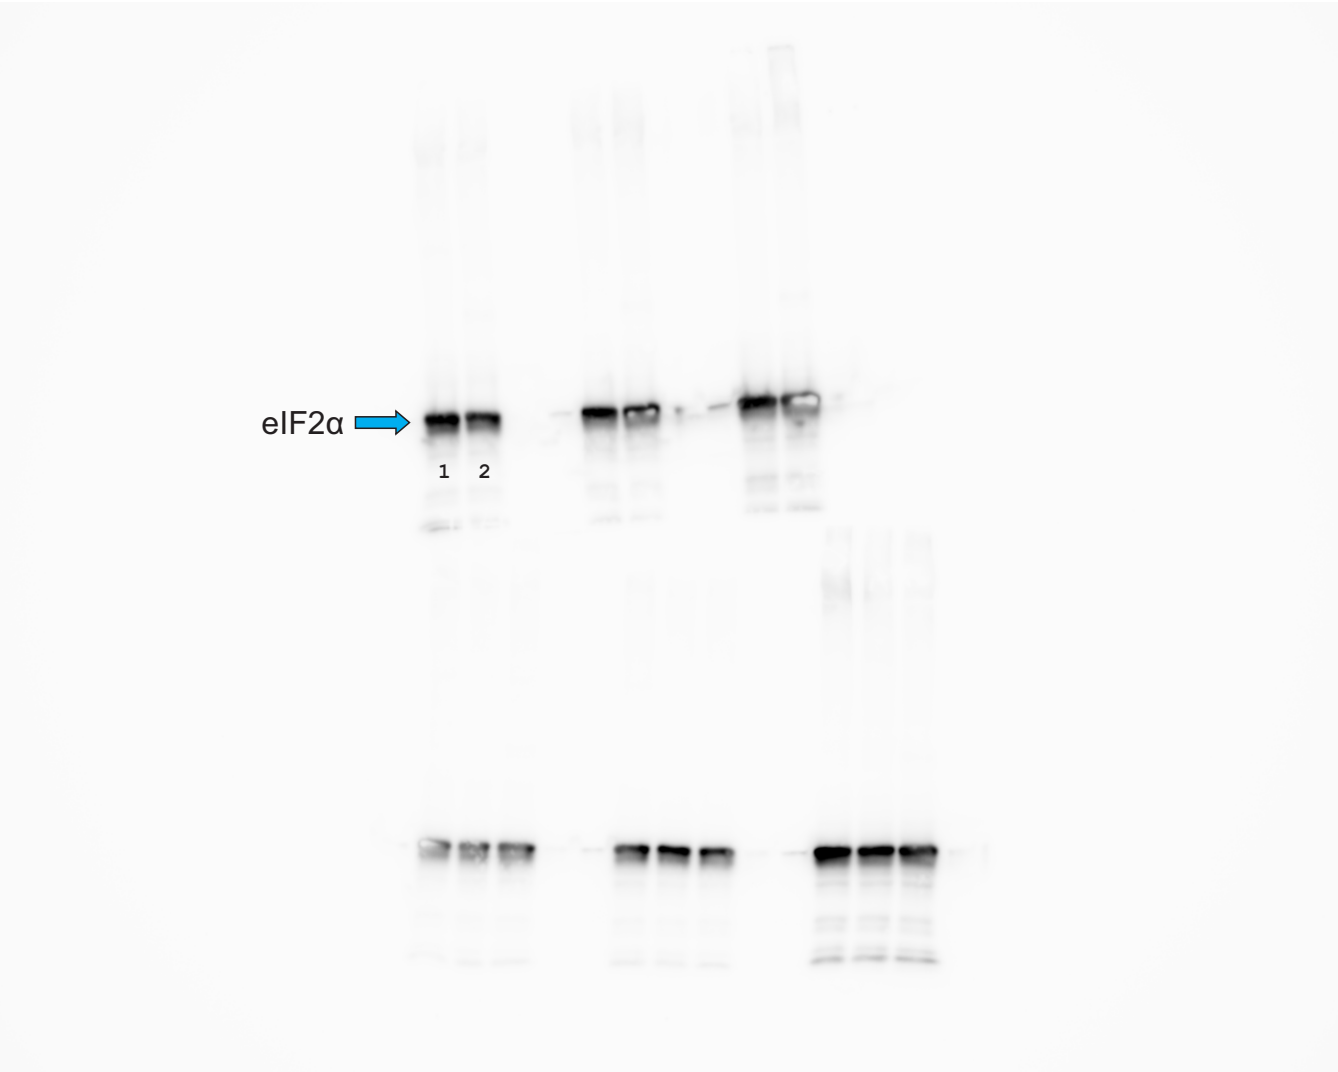

**Full and uncropped Western Blot for Figure 6D (Actin)**

Blots 1-2 are in the figure.

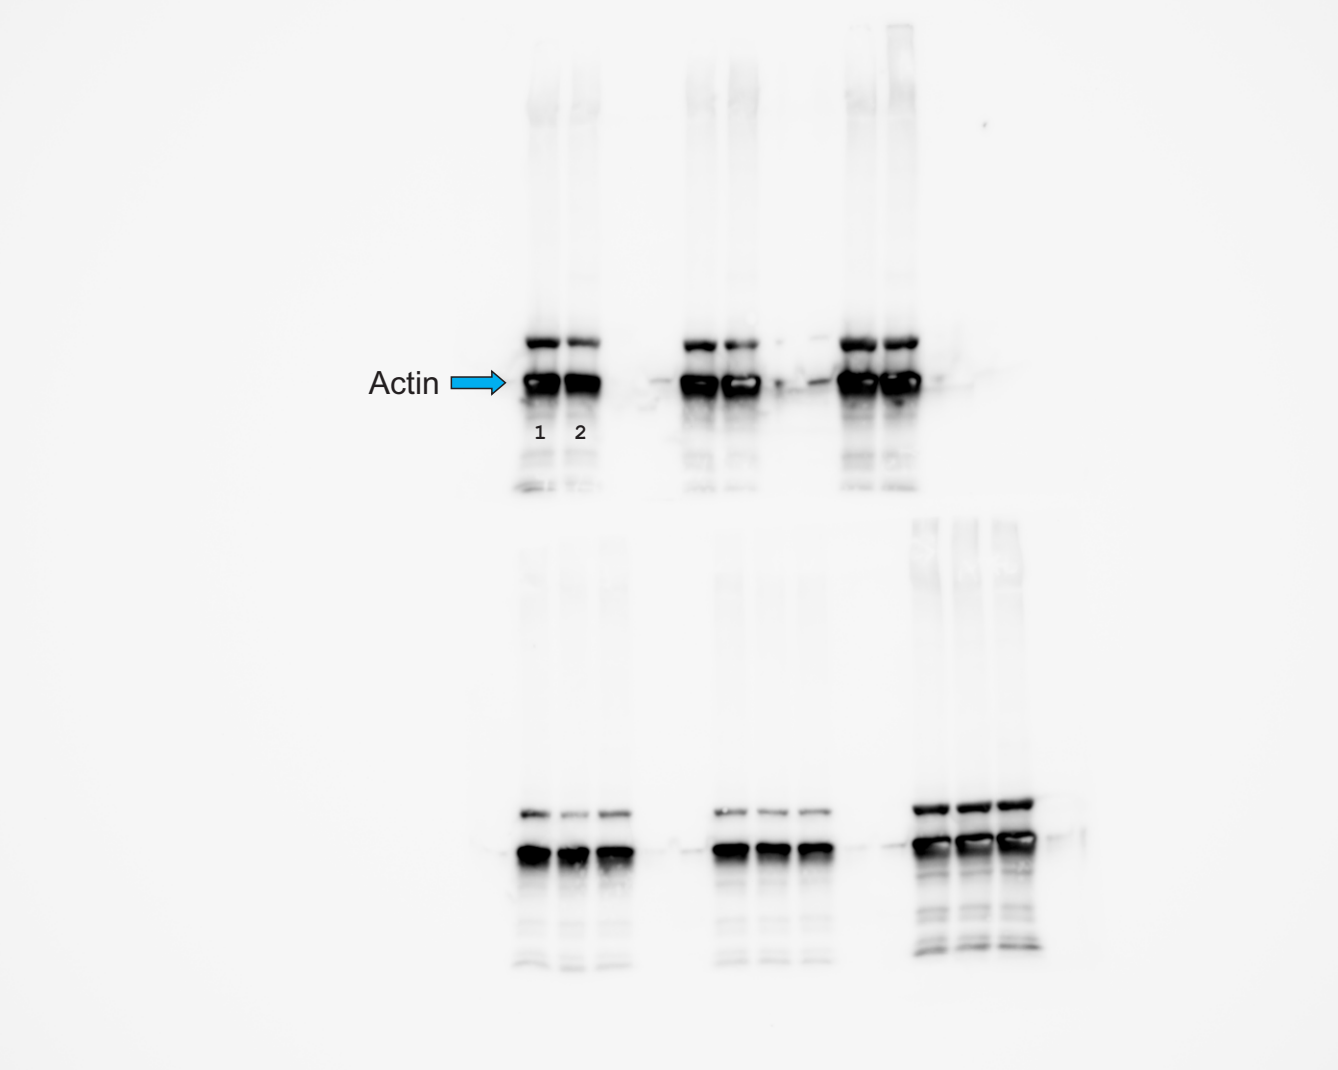

Supplement: Supplementary file 1 [file 1060451f8a939e0c256cd44e.pdf]
