# Supplementary material
Source: Research Square preprint supplement (doi:10.21203/rs.3.rs-9373070/v1)
Supplement: Supplementary file 2 [file 4828e40c796e1020c8650b0c.docx]

**Supplementary Table 1. List of primer sequences.**

| **Primer** | **Gene** | **Sequence** |
| --- | --- | --- |
| Human EIF2AK3 Forward | PERK (human) | AAG TGG AAT TTC AGT GTT GG |
| Human EIF2AK3 Reverse | PERK (human) | AGG TGC TTT CAA TAA ATC CG |
| Human XBP1s Forward | XBP1s (human) | GCT GAG TCC GCA GCA GGT |
| Human XBP1s Reverse | XBP1s (human) | CTG GGT CCA AGT TGT CCA GAA T |
| Human uXBP1 Forward | uXBP1 (human) | CAG ACT ACG TGC ACC TCT GC |
| Human uXBP1 Reverse | uXBP1 (human) | CTG GGT CCA AGT TGT CCA GAA T |
| Human HSPA5 Forward | HSPA5 (human) | GTC AGG CGA TTC TGG TCS TT |
| Human HSPA5 Reverse | HSPA5 (human) | GGT GAA AGA CCC CTG ACA AA |
| Human HERPUD1 Forward | HERPUD1 (human) | ATG TAC CTG CAT CAC GTT GG |
| Human HERPUD1 Reverse | HERPUD1 (human) | TGG TTG GGG TCT TCS GTT TC |
| Human DGAT2 Forward | DGAT2 (human) | GAG ACT ACT TTC CCA TCC AG |
| Human DGAT2 Reverse | DGAT2 (human) | GAA CTT CTT GCT CAC TTC TG |
| Human GAPDH Forward | GAPDH (human) | TCG GAG TCA ACG GAT TTG |
| Human GAPDH Reverse | GAPDH (human) | CAA CAA TAT CCA CTT TAC CAG AG |
| Human HSPA5 Promoter Forward | HSPA5 (human) | CAA TGA ACG GCC TCC AAC GA |
| Human HSPA5 Promoter Reverse | HSPA5 (human) | TCG GCT TAT ATA CCC TCC CCC |
| Human EIF2AK3 Promoter Forward | PERK (human) | TCA GAA TCC GCC ACG TAG TAA G |
| Human EIF2AK3 Promoter Reverse | PERK (human) | TGG AAG TGG ATG TCC CTC AAA G |
|  |  |  |
| **Oligo** | **Note** | **Sequence** |
| Human ATF6-KO Forward | sgRNA ATF6-KO#2 Foward | CAC CGG AAT AAG AGT CCA CTG ACC G |
| Human ATF6-KO Reverse | sgRNA ATF6-KO#2 Reverse | AAA CCG GTC AGT GGA CTC TTA TTC C |
| sgATF6#2 Sequencing Primer Forward | Forward primer flanking cut-site | GCT TTT ATT CCT CAG CCA ACA AGT |
| sgATF6#2 Sequencing Primer Reverse | Reverse primer flanking cut-site | GGA GAA AGA AAG GGT GGG AGA |
| sgATF6#2 Sanger Sequencing Primer | Primer for Sanger Sequencing | ACC CTT CCA GAG AAT TAG TGC A |
